# 1 **Field microenvironments regulate crop diel transcript and** 2 **metabolite rhythms**

3 Luíza Lane Barros Dantas<sup>1,2\*</sup>, Maíra Marins Dourado<sup>1\*</sup>, Natalia Oliveira de Lima<sup>1</sup>, Natale  
4 Cavaçana<sup>1</sup>, Milton Yutaka Nishiyama-Jr.<sup>3</sup>, Glaucia Mendes Souza<sup>1</sup>, Monalisa Sampaio  
5 Carneiro<sup>4</sup>, Camila Caldana<sup>5</sup>, Carlos Takeshi Hotta<sup>1†</sup>

6 1 Departamento de Bioquímica, Instituto de Química, Universidade de São Paulo, São  
7 Paulo, SP, 05508-000, Brazil

8 2 Present address: John Innes Centre, Norwich Research Park, Norwich, NR4 7UH, UK

9 3 Laboratório Especial de Toxicologia Aplicada, Instituto Butantan, São Paulo, SP, 05503-  
10 900, Brazil

11 4 Departamento de Biotecnologia e Produção Vegetal e Animal, Centro de Ciências  
12 Agrárias, Universidade Federal de São Carlos, São Carlos, SP, 13600-970, Brazil.

13 5 Max Planck Institute for Molecular Plant Physiology, Potsdam-Golm, Germany

14 \* These authors contributed equally to the work

15 † **Correspondence:** Carlos Takeshi Hotta ([hotta@iq.usp.br](mailto:hotta@iq.usp.br))

16 **Author Contributions:** Conceptualization, L.L.B.D., M.S.C., C.T.H.; Methodology,  
17 L.L.B.D., C.T.H.; Software, C.T.H., M.Y.N; Validation, L.L.B.D., N.O.L.; Investigation,  
18 L.L.B.D., N.O.L., C.T.H., C. C.; Resources, M.S.C., C. C.; Data Curation, C.T.H., M.Y.N;  
19 Writing – Original Draft, L.L.B.D., C.T.H.; Writing – Review & Editing, L.L.B.D., M.S.C., C.  
20 C., C.T.H.; Visualization; C. T. H.; Project Administration, C. T. H.; Funding Acquisition,  
21 C.T.H.

22 **Competing Interests:** The authors have no competing interests to declare.

23 **Acknowledgements:** This work was supported by the São Paulo Research Foundation  
24 (FAPESP) (grant nos. 11/00818-8, 15/06260-0 and 19/08534-0; BIOEN Program) and by  
25 the Serrapilheira Institute (grant no. Serra-1708-16001). L. L. B. D. and N. O. L. were  
26 supported by FAPESP scholarships (grants 11/08897-4 and 16/06740-4, respectively).  
27 We thank the support of Carolina G. Lembke for the oligoarrays hybridization. We thank  
28 the support of the LabMET at Brazilian Bioethanol Science and Technology Laboratory  
29 (CTBE/CNPEM) for the metabolite profiling analysis (MET-19154 and MET-20673).

## 30 **Abstract**

31 Most research in plant chronobiology was done in laboratory conditions. However, they  
32 usually fail to mimic natural conditions and their nuanced fluctuations, highlighting or  
33 obfuscating rhythmicity. High-density crops, such as sugarcane (*Saccharum* hybrid),  
34 generate field microenvironments that have specific light and temperature, as they shade  
35 each other. Here, we measured the metabolic and transcriptional rhythms in the leaves of  
36 4-month-old (4 mo.) and 9 mo. sugarcane grown in the field. Most of the assayed rhythms  
37 in 9 mo. sugarcane peaked >1 h later than in 4 mo. sugarcane, including rhythms of the  
38 circadian clock gene, *LATE ELONGATED HYPOCOTYL (LHY)*, but not *TIMING OF CAB*  
39 *EXPRESSION (TOC1)*. We hypothesized that older sugarcane perceives dawn later than  
40 younger sugarcane, due to self-shading. As a test, we measured *LHY* rhythms in plants  
41 on the east and the west side of a field. We also tested if a wooden wall built between  
42 lines of sugarcane also changed their rhythms. In both experiments, the *LHY* peak was  
43 delayed in the plants shaded at dawn. We conclude that plants in the same field may have  
44 different phases due to field microenvironments, which may impact important agronomical  
45 traits, such as flowering time, stalk weight and number.

46

## 47 **Introduction**

48 Plants are sessile organisms living in constantly changing environments. Some of those  
49 changes are rhythmic, due to the movements of the tilted Earth around the Sun, bringing  
50 seasons, and around itself, bringing day and night. The circadian oscillator is an  
51 adaptation for life in rhythmic environments. It is an internal regulatory network that allows  
52 plants to track the time of the day by generating responses on both metabolism and  
53 physiology levels. The ability to anticipate the rhythmic changes in the environment  
54 increases plants fitness (Green *et al.*, 2002; Dodd *et al.*, 2005). Plants that cannot keep  
55 their rhythms, desynchronize with the environment and assimilate less carbon (C),  
56 accumulate less biomass and have lower water use efficiency (Dodd *et al.*, 2005). The  
57 circadian oscillator network comprises a central oscillator that generates rhythms  
58 independently of environmental cues (zeitgebers), such as light and temperature; input  
59 pathways that continuously feed the central oscillator with internal and external  
60 information, synchronizing it with environmental rhythms (Webb *et al.*, 2019); and output  
61 pathways that gather temporal information generated from the interactions between the  
62 central oscillator and the input pathways and translate it into timely regulated metabolic  
63 and physiologic responses. The plant central oscillator includes several interlocked

64 feedback loops based on the regulation of transcription and translation. Dawn is marked  
65 by an increase in transcripts of *CIRCADIAN CLOCK ASSOCIATED 1* (*CCA1*, not found in  
66 monocots), *LATE ELONGATED HYPOCOTYL* (*LHY*) and *REVEILLE 8* (*RVE8*)  
67 expression (Alabadí *et al.*, 2001; Rawat *et al.*, 2011; Gray *et al.*, 2017), which in turn  
68 regulate and are regulated by the expression of members of the *PSEUDO RESPONSE*  
69 *REGULATOR* (*PRR*) gene family during the day (Nakamichi *et al.*, 2010; Huang *et al.*,  
70 2012). In monocots, this includes *PRR1*, *PRR37*, *PRR59*, *PRR73*, and *PRR95* (Hotta *et*  
71 *al.*, 2013; Calixto *et al.*, 2015; Dantas *et al.*, 2020). As *LHY* expression declines during the  
72 day, the expression of *PRR1*, usually called TIMING OF CAB EXPRESSION (*TOC1*),  
73 increases, leading to a peak near dusk (Alabadí *et al.*, 2001). In *Arabidopsis thaliana* (L.)  
74 Heynh., *TOC1* degradation is regulated by an interplay between *ZEITLUPE* (*AtZTL*) and  
75 *GIGANTEA* (*AtGI*) (Kim *et al.*, 2007; Cha *et al.*, 2017). In eudicots, a protein complex  
76 called EVENING COMPLEX (*EC*), that is composed of *LUX ARRHTHMO* (*LUX*), *EARLY*  
77 *FLOWERING 3* and *4* (*ELF3* and *ELF4*), is assembled during the night, repressing many  
78 other Central Oscillator genes (Herrero *et al.*, 2012). The *EC* still needs to be confirmed in  
79 monocots, even though *ELF3* is present and functional (Zhao *et al.*, 2012; Huang *et al.*,  
80 2017).

81 Most of the research in plant chronobiology was done in laboratory conditions. However,  
82 these conditions usually fail to fully mimic natural conditions and their nuanced  
83 fluctuations, highlighting or obfuscating phenomena that could only take place and be  
84 observed in the field (Annunziata *et al.*, 2017; Song *et al.*, 2018). In rice (*Oryza sativa* L.),  
85 mutations in homolog *OsGI* lead to a delay in flowering in short days and long days in  
86 laboratory conditions. However, this phenotype was not observed in long days in the field  
87 (Izawa *et al.*, 2011). In *Arabidopsis*, flowering under artificial conditions does not fully  
88 mimic flowering in nature due to the light quality and spectra, as well as the temperature  
89 gradients found in natural conditions (Song *et al.*, 2018). *Arabidopsis* grown under artificial  
90 light also had different metabolic profiles compared to plants grown under natural light  
91 (Annunziata *et al.*, 2017). Rhythms in the transcription of plants grown in natural  
92 conditions or the field are regulated by the circadian oscillator and by changes in external  
93 conditions, such as temperature, light intensity, humidity, and photoperiod, or internal  
94 conditions, such as plant age and plant physiology (Nagano *et al.*, 2012, 2019; Matsuzaki  
95 *et al.*, 2015; Panter *et al.*, 2019; Dantas *et al.*, 2020).

96 Here we have measured metabolic and transcriptional rhythms in sugarcane leaves grown  
97 in the field. We show that transcript and metabolite rhythms in 4 months old (4 mo.)

98 sugarcane have earlier peaks in the day compared to 9 mo. sugarcane, with phase shifts  
99 ranging from 2 h to 12 h. These phase shifts are correlated with changes in the peak of  
100 expression of circadian oscillator genes. Such variation in the timing of the peaks was  
101 confirmed by experiments done on plants grown in the east and west sides of the field, or  
102 on plants that were separated by a wooden wall. We conclude that the rhythms of  
103 metabolites and transcripts associated with the sugarcane circadian oscillator are  
104 regulated by external rhythms in field microenvironments.

105

## 106 **Results and Discussion**

107 We initially measured metabolite rhythms in commercial sugarcane (*Saccharum* hybrid,  
108 cultivar SP80 3280) grown in a field by harvesting the leaves of 4 mo. and 9 mo.  
109 sugarcane, at different dates, every 2 h for 26 h, starting 1.5 h before dawn (Figure 1A).  
110 All plants were harvested from the middle of the field to avoid margin effects. The  
111 metabolic profiles of plants harvested during the day and the night cluster separately,  
112 except for the leaves harvested 21 h after dawn (zeitgeber time 21, ZT21) in 4 mo.  
113 sugarcane and leaves harvested at ZT01 in 9 mo. sugarcane (Figure 1B). Most of the 20  
114 metabolites that were rhythmic in both plants (75%) peaked later in 9 mo. sugarcane  
115 (Figure 1C, Supplemental Figure S2). The largest phase shifts (> 8h), seen in Glutamate,  
116 Serine, 5-Oxoproline, Tagatose and GABA (Figure 1G and Supplemental Figures S4I and  
117 S5), may be due to differences in plant age. In *Nicotiana tabacum* (L.), a similar phase  
118 change was observed in the rhythms of Glutamate and GABA in sink and source leaves  
119 (Masclaux-Daubresse *et al.*, 2002).

120 We also measured rhythms in transcript accumulation using a custom Agilent oligoarrays  
121 (Lembke *et al.*, 2012). Transcriptional rhythms of 9 mo. sugarcane leaves were described  
122 in previous work, together with transcriptional rhythms of internodes 1&2 and internodes 5  
123 (Dantas *et al.*, 2020). In the transcriptomic analysis of 4 mo. sugarcane leaves, there were  
124 8,553 expressed transcripts, 86% of the expressed transcripts found in 9 mo. sugarcane  
125 leaves (9,891) (Figure 2A). We considered that 4,143 of the expressed transcripts were  
126 rhythmic in 4 mo. sugarcane leaves (48.4%), lower than in 9 mo. sugarcane leaves  
127 (68.3%, Supplemental Figure S6A). About half of the transcripts that were rhythmic in both  
128 4 mo. and 9 mo. sugarcane leaves peaked earlier in the older plants (51.5%), whilst  
129 48.2% peaked within 1 h of each other (Figure 2B).

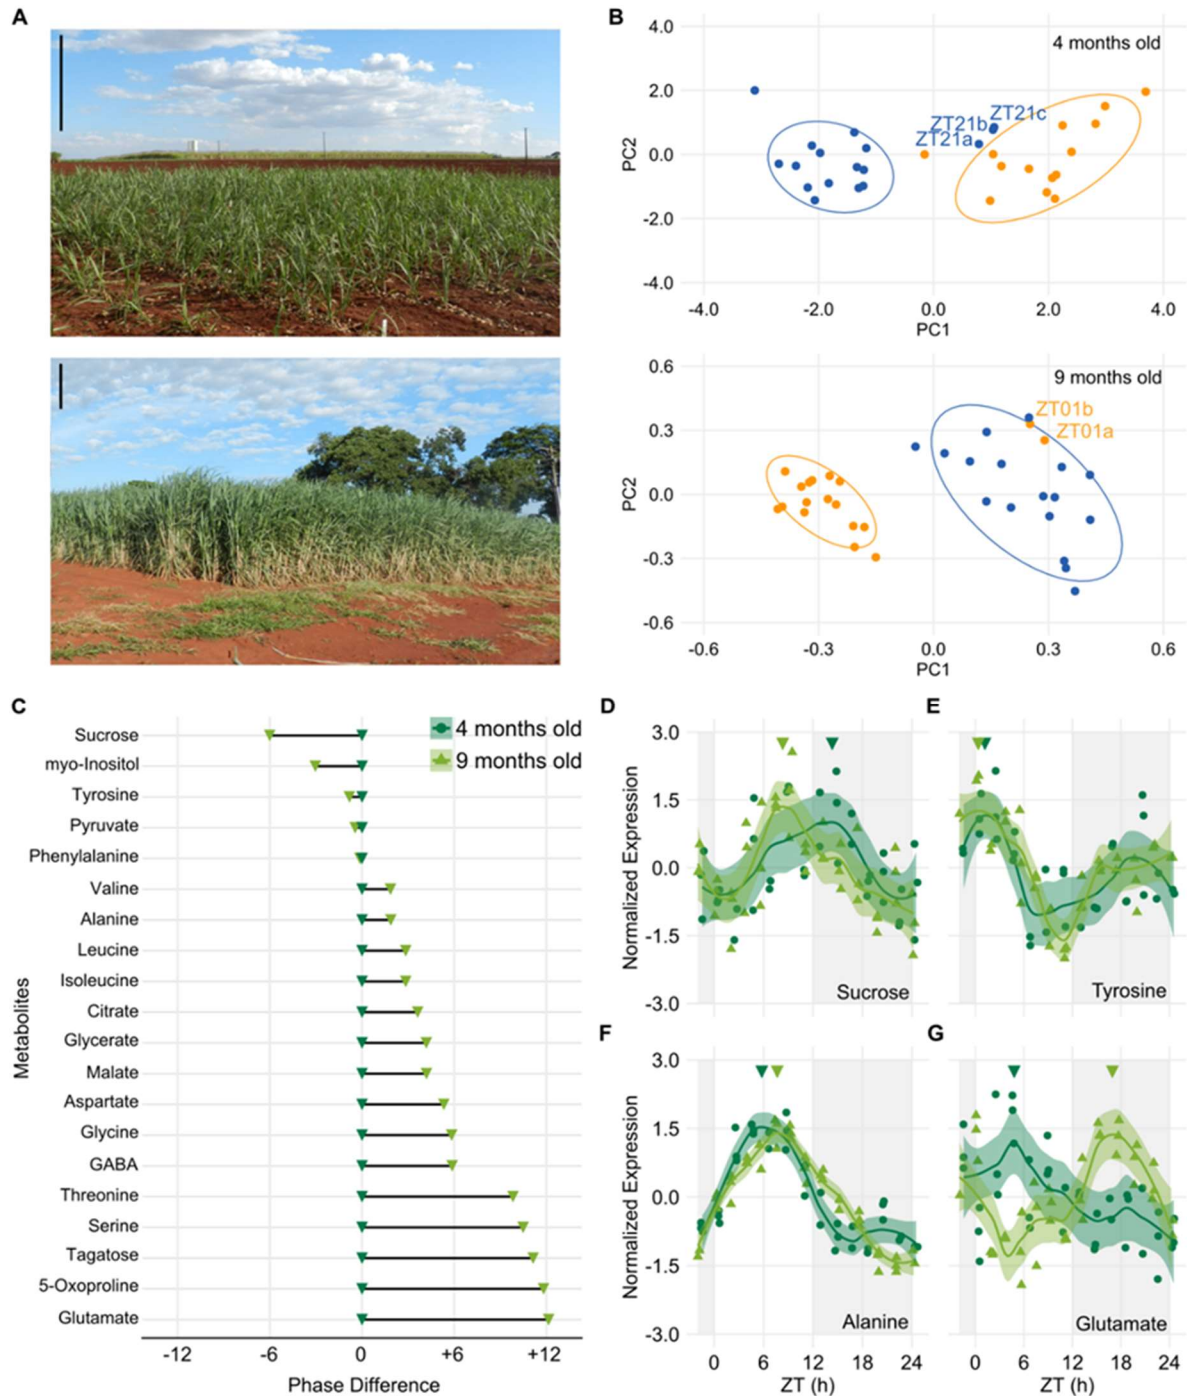

130

131 **Figure 1. Field-grown sugarcane has metabolic rhythms with different phases. (A)**  
 132 Leaves from sugarcane grown for 4 months old (upper photo) and 9 mo. (lower photo) in  
 133 the field were harvested for 26 h. Bar = 0.5 m. **(B)** Principal Component Analysis (PCA) of  
 134 the metabolic data from the leaves of 4 mo. and 9 mo. sugarcane during the day (yellow)  
 135 or during the night (blue). The percentages of total variance represented by the principal  
 136 component 1 (PC1) and principal component 2 (PC2) is 63.7% and 60.3%. Metabolites  
 137 identified in less than 70% of the samples, and samples with less than 70% of the total  
 138 metabolites identified were excluded from the PCA. Data ellipses were drawn for the  
 139 samples harvested during the day and the night (0.85 confidence level). **(C)** Phase  
 140 difference in metabolites that were considered rhythmic in both 4 mo. (dark green) and 9  
 141 mo. plants (light green). **(D-G)** Rhythms of **(D)** Sucrose, **(E)** Tyrosine, **(F)** Alanine, and **(G)**

142 Glutamate in 4 mo. (dark green) and 9 mo. plants (light green). All biological replicates  
143 (circles in 4 mo. or triangles in 9 mo.) and their LOESS curve (continuous lines  $\pm$  SE) are  
144 shown. Inverted triangles show the time of the maximum value of the LOESS curve.  
145 Metabolite levels were normalized with Z-score. To compare the rhythms of samples  
146 harvested in different seasons, the time of harvesting (ZT) was normalized to a  
147 photoperiod of 12 h day/ 12 h night. The light-grey boxes represent the night period.

148

149 We analyzed the proportion of rhythmic transcripts in different functional categories  
150 (Figure 2C and Supplemental Figure 6C). The *Circadian Clock*, *ABA/drought signalling*,  
151 *Gibberellin Signalling*, *Transporters*, and *Flowering* are examples of functional categories  
152 that have a higher proportion of rhythmic transcripts than the average. Flowering is an  
153 important process that could be affected by phase changes in rhythmic genes. As the  
154 vegetative stage is the one harvested, flowering is usually undesired in sugarcane.  
155 Sugarcane enters the reproductive phase in response to the shortening of the photoperiod  
156 over 15 days, and just a 0.5 h difference in photoperiod can trigger flowering in most  
157 genotypes (Midmore, 1980; Moore & Berding, 2013; Glassop *et al.*, 2014). Thus, the  
158 correct measurement of dawn and dusk is essential for flowering in sugarcane. Several  
159 sugarcane genes associated with flowering had their transcription patterns changed.  
160 *FLOWERING LOCUS D* (*ScFLD*), a histone acetylase is only expressed in 9 mo.  
161 sugarcane leaves, with a peak at ZT9 (Figure 2D). Mutation of *FLD* in Arabidopsis (He *et*  
162 *al.*, 2003) and RNA interference of its homolog in rice (Shibaya *et al.*, 2016) delays  
163 flowering. The flowering genes: *CONSTITUTIVE PHOTOMORPHOGENIC 1* (*ScCOP1*)  
164 (Tanaka *et al.*, 2011), *CYCLING DOF FACTOR1* (*ScCDF1*) (Higgins *et al.*, 2010), *SHORT*  
165 *VEGETATIVE* (*ScSVP-1* and *-3*) (Higgins *et al.*, 2010), *SUPPRESSOR OF CONSTANS*  
166 *OVEREXPRESSION 1* (*ScSOC1*) (Higgins *et al.*, 2010), *FLOWERING LOCUS T* (*ScFT*)  
167 (Abdul-Awal *et al.*, 2020), and *APETALA* (*ScAP1*) (Preston & Kellogg, 2006) peak an  
168 average 2 h earlier in 4 mo. sugarcane leaves, except for *ScSVP-2* (Figure 2E-G and  
169 Supplemental Figure 7). Among those genes, *ScSVP-1*, *ScSVP-3*, *ScSOC1*, *ScFT*, and  
170 *ScCDF1* peak before dawn in 4 mo. sugarcane leaves and after dawn in 9 mo. sugarcane  
171 leaves (2E-G and Supplemental Figure 7A). In Arabidopsis, *AtLHY* and *AtCCA1* reduce  
172 *AtSVP* protein levels, which is a repressor of flowering (Fujiwara *et al.*, 2008). A change in  
173 the relative phase between *ScLHY* and *ScSVP* may change the *ScSVP* protein levels,  
174 impacting flowering. Thus, neighbour shading could trigger flowering earlier than the  
175 actual critical photoperiod. In sugarcane, photoperiod is perceived by the spindle, a whorl  
176 of immature leaves on the top of the plant, which may minimize the effects of shading

177 from neighbour plants (Moore & Berding, 2013; Glassop *et al.*, 2014; Glassop & Rae,  
178 2019).

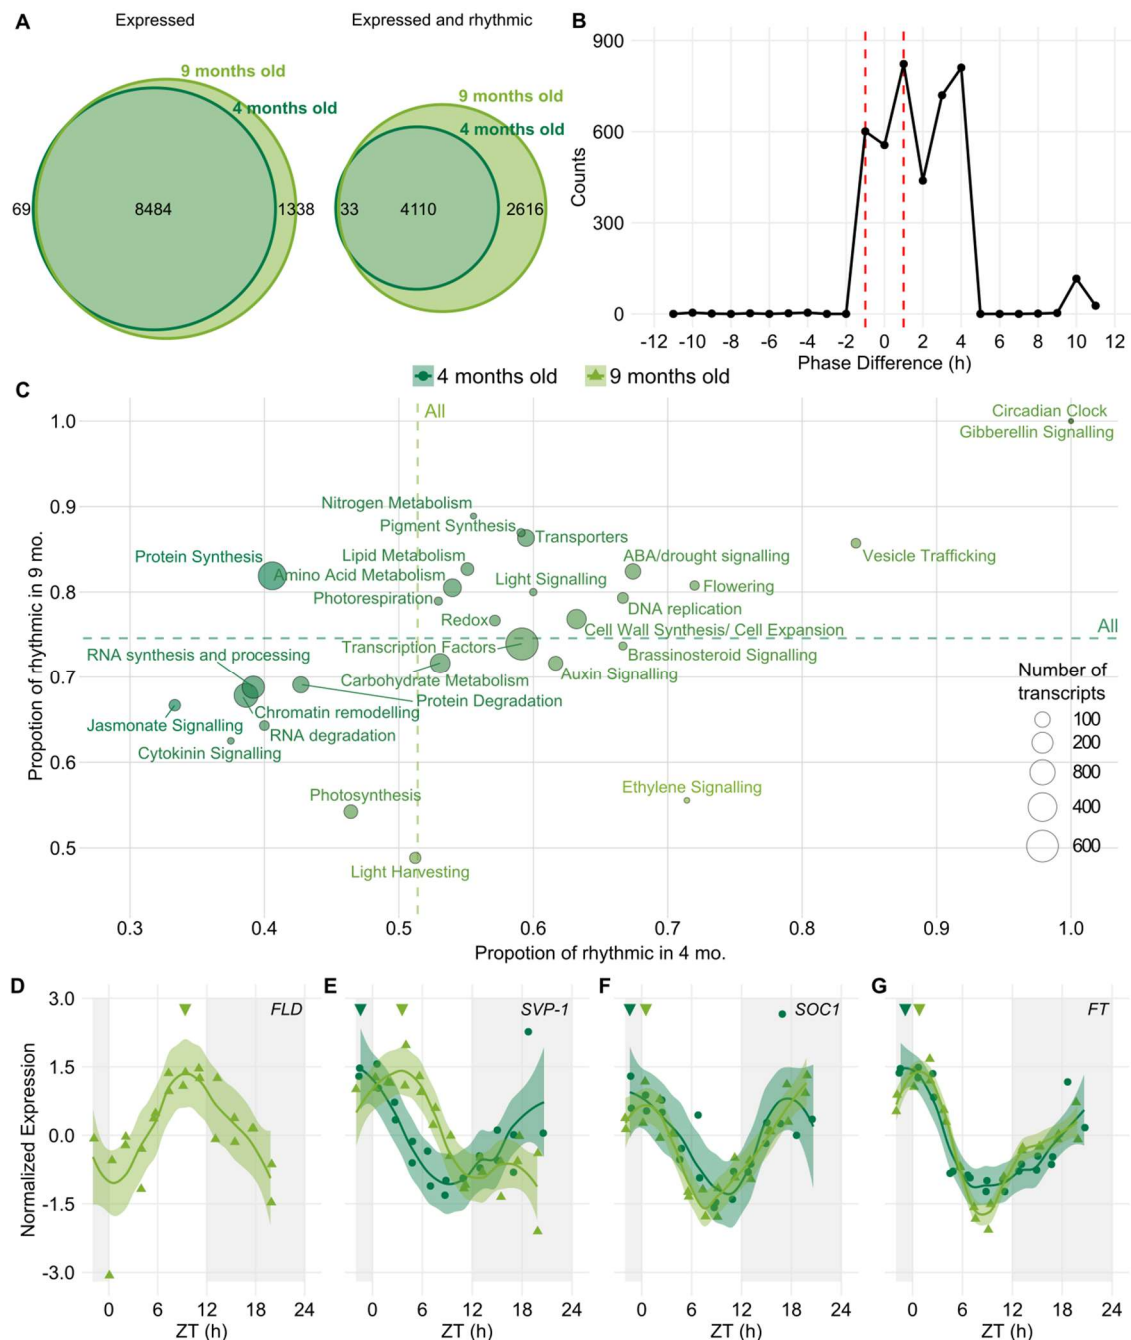

179

180 **Figure 2. Field-grown sugarcane has transcriptional rhythms with different phases.**

181 Leaves from sugarcane grown for 4 months old (4 mo.) and 9 mo. in the field were  
182 harvested for 26 h. **(A)** Euler diagrams of all expressed transcripts and expressed  
183 transcripts that are rhythmic in 4 mo. (dark green) and 9 mo. (light green) sugarcane  
184 leaves in diel conditions. **(B)** Distribution of phase differences between rhythmic  
185 transcripts from 4 mo. and 9 mo. sugarcane. Phase differences under  $\pm 1$  h are not  
186 considered significant (red dashed line). **(C)** Proportion of rhythmic transcripts in different  
187 functional categories in 4 mo. and 9 mo. sugarcane leaves. The size of the circles shows  
188 the total number of expressed transcripts in each category. The colour of the circles

189 shows if there is an increase in the proportion of rhythmic transcripts in 4 mo. (light green)  
190 or in 9 mo. sugarcane leaves (dark green). The dotted lines represent the proportion of  
191 rhythmic transcripts among all annotated transcripts. **(D) FLOWERING LOCUS D**  
192 **(ScFLD)**, **(E) SHORT VEGETATIVE-1 (ScSVP-1)**, **(F) SUPPRESSOR OF CONSTANS**  
193 **OVEREXPRESSION (ScSOC1)**, and **(G) FLOWERING LOCUS T (ScFT)** rhythms  
194 measured in 4 mo. and 9 mo. sugarcane. All biological replicates and their LOESS curve  
195 (continuous lines  $\pm$  SE) are shown. Inverted triangles show the time of the maximum value  
196 of the LOESS curve. Time series were normalized using Z-score. To compare the rhythms  
197 of samples harvested in different seasons, the time of harvesting (ZT) was normalized to a  
198 photoperiod of 12 h day/ 12 h night. The light-grey boxes represent the night periods.

199

200 As the rhythms of metabolites and transcripts were different between 4 mo. and 9 mo.  
201 sugarcane leaves, we decided to compare the transcription levels of the core circadian  
202 clock genes *ScLHY* and *TIMING OF CAB EXPRESSION (ScTOC1)* (Figure 3A and  
203 Supplemental Figure S8). As *ScLHY* peaks at dawn and *ScTOC1* peaks at dusk under  
204 circadian conditions in sugarcane, it is possible to use these genes to track down how the  
205 timing of dawn and dusk is perceived by its circadian clock (Hotta *et al.*, 2013). *ScLHY*  
206 peaked 0.2 h after dawn in 4 mo. sugarcane leaves but peaked 2.7 h after dawn in 9 mo.  
207 sugarcane leaves (Figure 3A and Supplemental Figure S8A). A peak of *LHY* hours after  
208 dawn is atypical, as it is light-induced (Mockler *et al.*, 2007). In contrast, *ScTOC1* peaked  
209 at 11.0 h and 11.3 h after dawn in 4 mo. and 9 mo. sugarcane leaves, respectively (Figure  
210 3A and Supplemental Figure S8D). Among the other central oscillator genes investigated,  
211 *PSEUDO RESPONSE REGULATOR 73 (ScPRR73)*, *ScPRR59*, *ScGI*, *REVEILLE 8*  
212 *(ScRVE8)* and *EARLY FLOWERING 3 (ScELF3)* also peaked at similar times in 4 mo.  
213 and 9 mo. sugarcane leaves, while *ScPRR95* had an earlier peak (-2.6 h) in 9 mo.  
214 sugarcane leaves (Supplemental Figure S8). This could explain why only half of the  
215 rhythmic genes had phase changes.

216 A second *ScLHY* peak was also observed starting between 18.0 h and 20.0 h in 4 mo.  
217 sugarcane leaves (Figure 3A and Supplemental Figure S8A), also observed in  
218 metabolites such as Alanine (Figure 1F) and Pyruvate (Supplemental Figure 3C). A  
219 similar night peak was described in *Coffea arabica* L. and attributed to a response to the  
220 moonlight (Breitler *et al.*, 2020). In our experiment, the night peak started minutes after the  
221 crescent moon was set (ZT17-18).



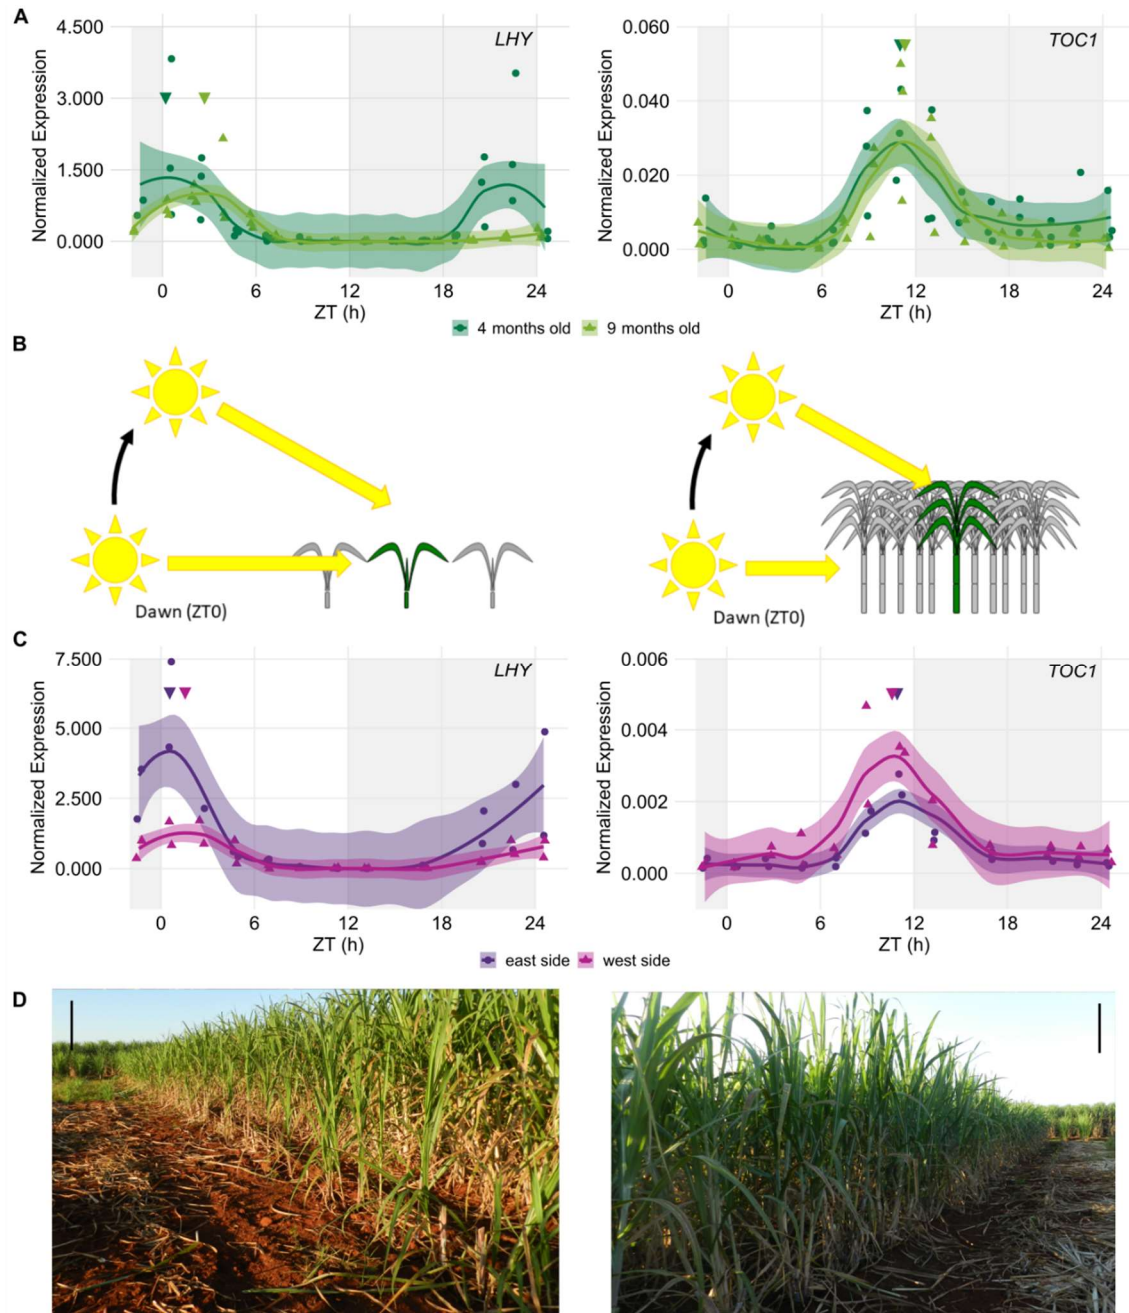

222

223 **Figure 3. Sugarcane leaves have different ScLHY phases in field-grown sugarcane.**

224 Leaves from sugarcane grown for 4 months old (mo.) and 9 mo. in the field were  
 225 harvested for 26 h. (A) Diel rhythms of LATE ELONGATED HYPOCOTYL (ScLHY) and  
 226 TIME OF CAB EXPRESSION 1 (ScTOC1) in the leaves of 4 mo. (dark green) and 9 mo.  
 227 (light green) sugarcane leaves. (B) When sugarcane is 4 months old (left), there is little  
 228 shading between plants. In comparison, 9 mo. sugarcane shade each other when the sun  
 229 is at a low angle (right). (C-D) Diel rhythms of ScLHY and ScTOC1 in the leaves of  
 230 sugarcane grown on the east side (purple, left photo) and the west side (pink, right photo)  
 231 of the field. Bar = 0.5 m. All biological replicates and their LOESS curve (continuous lines  
 232  $\pm$  SE) are shown. Inverted triangles show the time of the maximum value of the LOESS  
 233 curve. Time series were normalized using Z-score. To compare the rhythms of samples  
 234 harvested in different seasons, the time of harvesting (ZT) was normalized to a  
 235 photoperiod of 12 h day/ 12 h night. The light-grey boxes represent the night periods.

236 Transcript levels were measured using RT-qPCR. Relative expression was determined  
237 using GLYCERALDEHYDE-3-PHOSPHATE DEHYDROGENASE (*ScGAPDH*).

238

239 We hypothesized that phase changes are a consequence of the circadian oscillator of 9  
240 mo. sugarcane perceiving dawn later than 4 mo. sugarcane, as a consequence of shading  
241 effects from neighbouring plants. While young sugarcane plants interact little with their  
242 neighbours due to their short height, mature sugarcane plants usually grow densely  
243 surrounded by other plants and senescent leaves (Figure 1A), shading each other, and  
244 making it difficult for low angle sunlight to directly reach leaves uniformly in the entire field  
245 (Figure 3B). This hypothesis also explains why the metabolic profile of 9 mo. sugarcane  
246 leaves harvested at ZT01, before the *ScLHY* peak, was closer to the leaves harvested  
247 during the night than the plants harvested during the day (Figure 1B).

248 If our hypothesis was correct, plants grow on the east side of a field, that receives direct  
249 sunlight at dawn, and the west side would have *ScLHY* rhythms with different phases.  
250 Using leaves from 6 mo. plants, we estimated that *ScLHY* from sugarcane peaked 0.6 h  
251 after dawn in the east side of the field, and 1 h later on west side (Figure 3C). Light levels  
252 were also around 1 h late in the west side of the field in the morning (Figure 3D and  
253 Supplemental Figure S1C). These changes could affect the timing of output rhythms, as  
254 hundreds of genes are regulated directly by *AtLHY* in Arabidopsis (Harmer *et al.*, 2000;  
255 Adams *et al.*, 2018). In contrast, *ScTOC1* rhythms had similar phases (Figure 3C). In a  
256 similar experiment, Grape berries (*Vitis vinifera* L.) harvested from the east and the west  
257 side of a vine had different phases in sucrose rhythms (Reshef *et al.*, 2019).

258 To further confirm our hypothesis, we created artificial shading by building a wooden wall  
259 between the first two lines of 5 mo. sugarcane on the east side of the field (Figure 4). The  
260 wall was built two days before harvesting to avoid developmental effects, as well as any  
261 long-term shade avoidance responses, caused by shading. Plants before the wall  
262 received direct sunlight at dawn, while plants after the wall received direct sunlight 0.7 h  
263 later (Figure 4A, 4C and Supplemental Figure 1E), which also affected the local  
264 temperature (Supplemental Figure 1F). In sugarcane growing before the wall, *ScLHY*  
265 expressed in leaves peaked 1.1 h after dawn, whereas *ScLHY* peaked 2.4 h after dawn in  
266 leaves that were after the wall (Figure 4B). *ScTOC1* peaked at the same time in both  
267 conditions. Combining the three experiments, the peaks of *ScLHY* and *ScTOC1*  
268 happened  $10.4 \pm 0.5$  h ( $n = 3$ ) apart in plants not subjected to shading at dawn and  $8.7 \pm$

269 0.5 h (n = 3) apart in plants shaded at dawn, which could be enough to trigger  
270 photoperiodic responses.

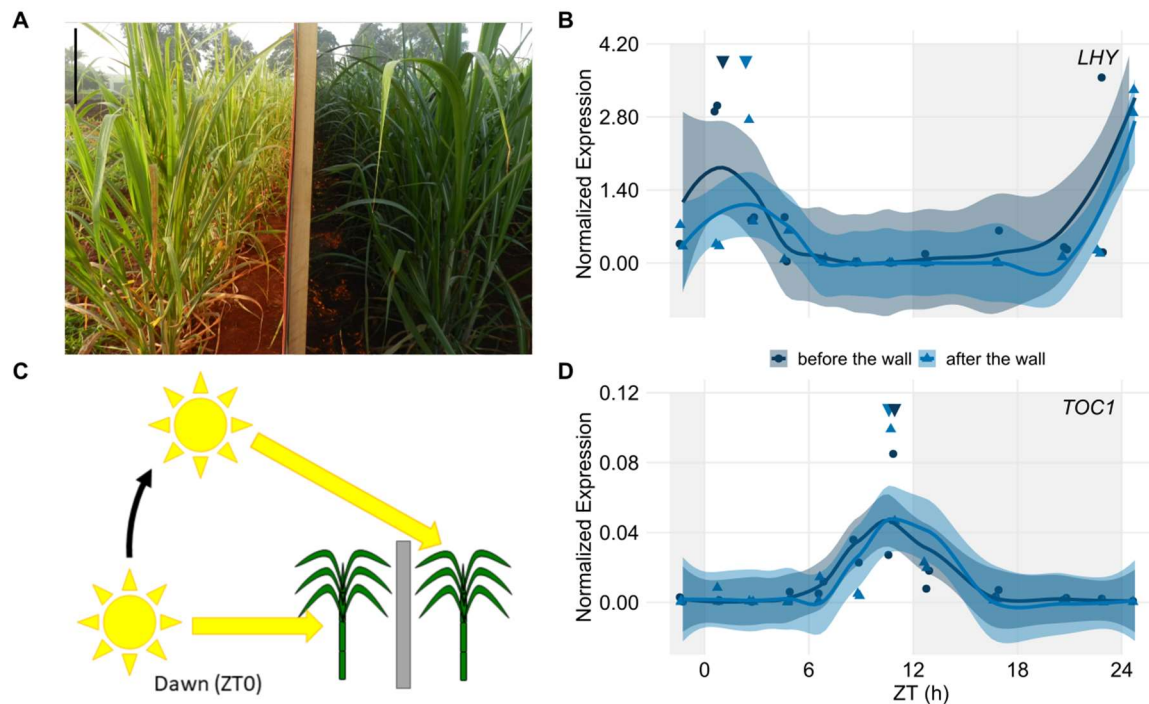

271

272 **Figure 4. Sugarcane leaves have different *ScLHY* phases on different sides of a**  
273 **wooden wall. (A)** Leaves from sugarcane grown before a wooden wall and after the  
274 wooden wall were harvested for 26 h. The photo was taken 1 h after dawn and  
275 horizontally flipped. Bar = 0.5 m. **(B and D)** Diel rhythms of *LATE ELONGATED*  
276 *HYPOCOTYL* (*ScLHY*) and *TIME OF CAB EXPRESSION 1* (*ScTOC1*) in the leaves of  
277 sugarcane grown before the wall (dark blue) and after the wall (light blue). All biological  
278 replicates and their LOESS curve (continuous lines  $\pm$  SE) are shown. Inverted triangles  
279 show the time of the maximum value of the LOESS curve. Time series were normalized  
280 using Z-score. To compare the rhythms of samples harvested in different seasons, the  
281 time of harvesting (ZT) was normalized to a photoperiod of 12 h day/ 12 h night. The light-  
282 grey boxes represent the night periods. Transcript levels were measured using RT-qPCR.  
283 Relative expression was determined using *GLYCERALDEHYDE-3-PHOSPHATE*  
284 *DEHYDROGENASE* (*ScGAPDH*). **(C)** An artificial wall was used to prevent direct low-  
285 angle sunlight to reach sugarcane at dawn.

286

287 Microenvironment changes due to shading also affect photosynthesis. In *Arabidopsis*,  
288 photosynthetic soluble sugars have been shown to regulate the circadian oscillator  
289 (Haydon *et al.*, 2013; Frank *et al.*, 2018). Hence, the phase changes seen in *ScLHY* could  
290 be driven by changes in photosynthesis or, specifically, by carbon assimilation into  
291 sucrose. Moreover, photosynthesis is one of the factors that impact rhythms in gene  
292 expression in *Arabidopsis halleri* subsp. *gemmifera* (Matsum.) O'Kane & Al-Shehbaz in  
293 natural conditions (Nagano *et al.*, 2019). It is unclear how the circadian oscillator and

294 metabolites rhythms are interconnected in sugarcane. However, sucrose and myo-Inositol  
295 were the only metabolites that had an earlier phase in the leaves of 9 mo. sugarcane  
296 (Figure 1D and Supplemental Figure S3A). Indeed, sucrose levels in the first 4 h of the  
297 day were similar in 4 mo. and 9 mo. plants. Hence, sucrose from photosynthesis might not  
298 be the factor explaining the observed phase changes, but our analysis only covered a few  
299 photosynthetic metabolites.

300 We found that the location of a plant within a field can change the perception of dawn by  
301 the circadian clock due to differences in field microenvironments. The circadian clock  
302 regulates carbon allocation, which may impact agronomic traits (Yazdanbakhsh *et al.*,  
303 2011; Kölling *et al.*, 2015). In *Sorghum bicolor* (L.) Moench. grown at high and low  
304 densities, changes in transcription levels of *SbLHY* and *SbTOC1* were correlated with  
305 differences in internode length (Kebrom *et al.*, 2020). As only one time point was sampled  
306 in that study, the detected differences in expression levels could be an indication of the  
307 phase differences we detected (Supplemental Figure S9). When row spacings in  
308 sugarcane fields were changed between 1.5 m and 2.3 m, cane yields (t/ha) were  
309 maintained, as the stalk numbers and weight would change in response to different plant  
310 densities (Garside *et al.*, 2009; Chilawal *et al.*, 2018). In grapes,

311 The circadian clock increases the productivity of plants when its phase matches the phase  
312 of environmental rhythms (Dodd *et al.*, 2005). It is usually accepted that rhythms of plants  
313 under the same photoperiod have matching phases. We have evidence that field  
314 microenvironmental rhythms and not astronomical rhythms regulate the plant circadian  
315 oscillator of plants in natural, fluctuating conditions, as well as transcriptional and  
316 metabolic rhythms. Rhythms in field microenvironments are another factor to consider  
317 when translating knowledge from the lab to the field.

318

## 319 **Materials and Methods**

### 320 *Field conditions, plant growth, and harvesting*

321 All three assayed sugarcane fields were located in the same area, at the Federal  
322 University of São Carlos, campus Araras, in São Paulo state, Brazil (22°21'25" S, 47°23'3"  
323 W; altitude of 611 m). The soil was classified as a Typic Eutroferric Red Latosol.  
324 Sugarcane from the commercial variety SP80 3280 (*Saccharum* hybrid) was used in all  
325 experiments. The environmental conditions for the three experiments were collected from  
326 a local weather station or from within the field (Supplemental Figure S1). Light intensity

327 was measured with the sensor parallel to the ground. Plants were sampled every 2 h for  
328 26 h, starting 1.5 h before dawn. For all experiments, the leaves +1 of nine sugarcane  
329 individuals were harvested and separated into three pools of three individuals, each pool  
330 was considered a biological replicate. The leaves +1 are the first fully photosynthetically  
331 active leaf in sugarcane. Each sampling took less than 30 min and the harvested tissue  
332 was immediately frozen in liquid nitrogen. In the first experiment, sugarcane was planted  
333 in April/2012 and sampled in August/2012 (4 months old), during winter, and in  
334 January/2013 (9 months old), during summer. In winter, dawn was at 6:30, and dusk was  
335 at 18:00 (11.5 h day/12.5 h night). In summer, dawn was at 5:45, and dusk was at 19:00  
336 (13.25 h day/10.75 h night). For the second experiment (east and west margins), plants  
337 were planted in October/2014 and harvested in March/2015 (5 months old) (12.0 h  
338 day/12.0 h night). In the third experiment, plants (the wall experiment) were also planted in  
339 October/2014, but harvested in April/2015 (6 months old) (11.25 h day/12.75 h night). The  
340 orientation of the sugarcane was north to south. In the wall experiment, a 2 m high wall  
341 made of plywood sheets was built between the first and the second rows on the east side  
342 of the field two days before harvest day. To compare the rhythms of samples harvested in  
343 different seasons, the time of harvesting was normalized to a photoperiod of 12 h day/ 12  
344 h night using the following equations: for times during the daytime,  $ZT = 12 \cdot T \cdot Pd^{-1}$ , where  
345 ZT is the normalized time, T is the time from dawn (in hours), and Pd is the length of the  
346 day (in hours); for times during the nighttime,  $ZT = 12 + 12 \cdot (T - Pd) \cdot Pn^{-1}$ , where ZT is the  
347 normalized time, T is the time from dawn (in hours), Pd is the length of the day (in hours),  
348 and Pn is the length of the night (in hours).

349

### 350 *Metabolome*

351 Metabolites were extracted from all 3 biological replicates. 50 mg of the grounded tissue  
352 was used for MTBE: methanol: water 3:1:1 (v/v/v) extraction, as described previously  
353 (Giavalisco *et al.*, 2011). The 100  $\mu$ l of the organic phase was dried and derivatized as  
354 previously described (Roessner *et al.*, 2001). 1  $\mu$ l of the derivatized samples were  
355 analyzed on a Combi-PAL autosampler (Agilent Technologies) coupled to an Agilent 7890  
356 gas chromatograph coupled to a Leco Pegasus 2 time-of-flight mass spectrometer  
357 (LECO, St. Joseph, MI, USA) in both split (1:40) and splitless modes (Weckwerth *et al.*,  
358 2004; Ferreira *et al.*, 2018). Chromatograms were exported from Leco ChromaTOF  
359 software (version 3.25) to R software. Peak detection, retention time alignment, and  
360 library matching were performed using *Target Search R-package* (Cuadros-Inostroza *et*

361 *al.*, 2009). Metabolites were quantified by the peak intensity of a selective mass.  
362 Metabolites intensities were normalized by dividing the fresh-weight, followed by the sum  
363 of total ion count and global outlier replacement as described previously (Giavalisco *et al.*,  
364 2011). Each metabolite value was further normalized to Z-score. The principal component  
365 analysis was performed using *pcaMethods* Bioconductor R package. Data ellipses were  
366 drawn for the samples harvested during the day and the night (0.85 confidence level).

367

### 368 *Oligoarray hybridizations*

369 Oligoarrays were hybridized as described before (Hotta *et al.*, 2013; Dantas *et al.*, 2020).  
370 Briefly, frozen samples were pulverized in dry, and 100 mg were used for total RNA  
371 extraction using Trizol (Life Technologies). The RNA was treated with DNase I (Life  
372 Technologies) and cleaned using the RNeasy Plant Mini kit (Qiagen) following the  
373 supplier's recommendations. The total RNA quality was assayed using an Agilent RNA  
374 6000 Nano Kit Bioanalyzer chip (Agilent Technologies). Labelling was done following the  
375 Low Input Quick Amp Labelling protocol of the Two-Color Microarray-Based Gene  
376 Expression Analysis system (Agilent Technologies). Hybridizations were done using a  
377 custom 4×44 k oligoarray (Agilent Technologies) that was previously described (Lembke  
378 *et al.*, 2012; Hotta *et al.*, 2013). Two hybridizations were done for each time point against  
379 an equimolar pool of all samples of each organ. Each duplicate was prepared  
380 independently using dye swaps. Data were extracted using the Feature Extraction  
381 software (Agilent Technologies). Background correction was applied to each dataset. A  
382 nonlinear LOWESS normalization was also applied to the datasets to minimize variations  
383 due to experimental manipulation. Signals that were distinguishable from the local  
384 background signal were taken as an indication that the corresponding transcript was  
385 expressed. The GenBank IDs of all sugarcane genes mentioned here can be found in the  
386 Supplemental Material (Supplemental Table S1). The complete dataset can be found at  
387 the Gene Expression Omnibus public database under the accession number GSE129543  
388 and GSE171222.

389

### 390 *Data analysis*

391 For further analysis, only transcripts that were found to be expressed in more than 6 of the  
392 12 time points were considered to be expressed. Identification of rhythmic transcripts was

393 done using an algorithm described in a previous work (Dantas *et al.*, 2020). All the time  
394 series from expressed transcripts were grouped in co-expressed modules using the R  
395 package weighted correlation network analysis (WGCNA) (Langfelder & Horvath, 2008)  
396 with the same parameters as before (Dantas *et al.*, 2020). Co-expression modules were  
397 considered rhythmic or non-rhythmic using JTK-CYCLE ( $P$ -value of  $< 0.75$ ) (Hughes *et*  
398 *al.*, 2010). LOESS (locally estimated scatterplot smoothing) regression was used to  
399 establish the timing of the peak, or the phase, of each rhythmic time series (Dantas *et al.*,  
400 2019). Euler diagrams were done using the R package *eulerr*. Code to fully reproduce our  
401 analysis is available on GitHub (<https://github.com/LabHotta/Microenvironments>) and  
402 archived on Zenodo (<http://doi.org/10.5281/zenodo.4645464>).

403

#### 404 *RT-qPCR analysis*

405 Frozen leaf samples were pulverized on dry ice using a coffee grinder (Model DCG-20,  
406 Cuisinart, China). 100 mg of each pulverized samples were used for total RNA extractions  
407 using Trizol (Life Technologies), according to the manufacturer's protocol. Total RNA was  
408 treated with DNase I (Life Technologies) and cleansed using the RNeasy Plant Mini Kit  
409 (Qiagen). Both RNA quality and concentration were checked using Agilent RNA 6000  
410 Nano Kit Bioanalyzer chip (Agilent Technologies). 5  $\mu$ g of the purified RNA was used in  
411 the reverse transcription reactions using the SuperScript III First-Strand Synthesis System  
412 for RT-PCR (Life Technologies). The RT-qPCR reactions were done using Power SYBR  
413 Green PCR Master Mix (Applied Biosystems), 10 $\times$  diluted cDNA, and specific primers as  
414 previously described (Hotta *et al.*, 2013). Reactions were placed in 96-well plates and  
415 read with the Fast 7500/7500 Real-Time PCR System (Applied Biosystems). Ct  
416 determination was performed using the Fast 7500/7500 Real-Time PCR System built-in  
417 software (Applied Biosystems). The  $2^{-\Delta CT}$  method was used to calculate relative  
418 expression, using *GLYCERALDEHYDE-3-PHOSPHATE DEHYDROGENASE*  
419 (*ScGAPDH*) as a reference gene (Hotta *et al.*, 2013). All primers used can be found in the  
420 Supplemental Material (Supplemental Table S2).

421

## 422 **References**

- 423 **Abdul-Awal SM, Chen J, Xin Z, Harmon FG. 2020.** A sorghum gigantea mutant attenuates florigen  
424 gene expression and delays flowering time. *Plant Direct* **4**: e00281.
- 425 **Adams S, Grundy J, Veflingstad SR, Dyer NP, Hannah MA, Ott S, Carré IA. 2018.** Circadian control  
426 of abscisic acid biosynthesis and signalling pathways revealed by genome-wide analysis of LHY  
427 binding targets. *New Phytologist* **220**: 893–907.
- 428 **Alabadí D, Oyama T, Yanovsky MJ, Harmon FG, Más P, Kay SA. 2001.** Reciprocal regulation  
429 between TOC1 and LHY/CCA1 within the Arabidopsis circadian clock. *Science (New York, N.Y.)* **293**:  
430 880–883.
- 431 **Annunziata MG, Apelt F, Carillo P, Krause U, Feil R, Mengin V, Lauxmann MA, Köhl K, Nikoloski  
432 Z, Stitt M, et al. 2017.** Getting back to nature: a reality check for experiments in controlled  
433 environments. *Journal of Experimental Botany* **68**: 4463–4477.
- 434 **Breitler J-C, Djerrab D, Leran S, Toniutti L, Guittin C, Severac D, Pratlong M, Dereeper A, Etienne  
435 H, Bertrand B. 2020.** Full moonlight-induced circadian clock entrainment in *Coffea arabica*. *BMC  
436 Plant Biology* **20**: 24.
- 437 **Calixto CPG, Waugh R, Brown JWS. 2015.** Evolutionary relationships among barley and  
438 Arabidopsis core circadian clock and clock-associated genes. *Journal of Molecular Evolution* **80**:  
439 108–119.
- 440 **Cha J-Y, Kim J, Kim T-S, Zeng Q, Wang L, Lee SY, Kim W-Y, Somers DE. 2017.** GIGANTEA is a co-  
441 chaperone which facilitates maturation of ZEITLUPE in the Arabidopsis circadian clock. *Nature  
442 Communications* **8**: 3.
- 443 **Chiluwal A, Singh HP, Sainju U, Khanal B, Whitehead WF, Singh BP. 2018.** Spacing Effect on  
444 Energy Cane Growth, Physiology, and Biomass Yield. *Crop Science* **58**: 1371–1384.
- 445 **Cuadros-Inostroza A, Caldana C, Redestig H, Kusano M, Lisec J, Peña-Cortés H, Willmitzer L,  
446 Hannah MA. 2009.** TargetSearch--a Bioconductor package for the efficient preprocessing of GC-  
447 MS metabolite profiling data. *BMC bioinformatics* **10**: 428.
- 448 **Dantas LL de B, Almeida-Jesus FM, de Lima NO, Alves-Lima C, Nishiyama-Jr MY, Carneiro MS,  
449 Souza GM, Hotta CT. 2020.** Rhythms of Transcription in Field-Grown Sugarcane Are Highly Organ  
450 Specific. *Scientific Reports* **10**: 6565.
- 451 **Dantas LLB, Calixto CPG, Dourado MM, Carneiro MS, Brown JWS, Hotta CT. 2019.** Alternative  
452 Splicing of Circadian Clock Genes Correlates With Temperature in Field-Grown Sugarcane.  
453 *Frontiers in Plant Science* **10**.
- 454 **Dodd AN, Salathia N, Hall A, Kevei E, Toth R, Nagy F, Hibberd JM, Millar AJ, Webb AA. 2005.**  
455 Plant circadian clocks increase photosynthesis, growth, survival, and competitive advantage.  
456 *Science* **309**: 630–3.
- 457 **Ferreira DA, Martins MCM, Cheavegatti-Gianotto A, Carneiro MS, Amadeu RR, Aricetti JA, Wolf  
458 LD, Hoffmann HP, de Abreu LGF, Caldana C. 2018.** Metabolite Profiles of Sugarcane Culm Reveal



- 459 the Relationship Among Metabolism and Axillary Bud Outgrowth in Genetically Related Sugarcane  
460 Commercial Cultivars. *Frontiers in Plant Science* **9**.
- 461 **Frank A, Matioli CC, Viana AJC, Hearn TJ, Kusakina J, Belbin FE, Wells Newman D, Yochikawa A,**  
462 **Cano-Ramirez DL, Chembath A, et al. 2018.** Circadian entrainment in Arabidopsis by the sugar-  
463 responsive transcription factor bZIP63. *Current Biology* **28**: 2597-2606.e6.
- 464 **Fujiwara S, Oda A, Yoshida R, Niinuma K, Miyata K, Tomozoe Y, Tajima T, Nakagawa M, Hayashi**  
465 **K, Coupland G, et al. 2008.** Circadian Clock Proteins LHY and CCA1 Regulate SVP Protein  
466 Accumulation to Control Flowering in Arabidopsis. *The Plant Cell* **20**: 2960–2971.
- 467 **Garside AL, Bell MJ, Robotham BG, Garside AL, Bell MJ, Robotham BG. 2009.** Row spacing and  
468 planting density effects on the growth and yield of sugarcane. 2. Strategies for the adoption of  
469 controlled traffic. *Crop and Pasture Science* **60**: 544–554.
- 470 **Giavalisco P, Li Y, Matthes A, Eckhardt A, Hubberten H-M, Hesse H, Segu S, Hummel J, Köhl K,**  
471 **Willmitzer L. 2011.** Elemental formula annotation of polar and lipophilic metabolites using (13) C,  
472 (15) N and (34) S isotope labelling, in combination with high-resolution mass spectrometry. *The*  
473 *Plant Journal: For Cell and Molecular Biology* **68**: 364–376.
- 474 **Glassop D, Rae AL. 2019.** Expression of sugarcane genes associated with perception of  
475 photoperiod and floral induction reveals cycling over a 24-hour period. *Functional Plant Biology*  
476 **46**: 314–327.
- 477 **Glassop D, Rae AL, Bonnett GD. 2014.** Sugarcane Flowering Genes and Pathways in Relation to  
478 Vegetative Regression. *Sugar Tech* **16**: 235–240.
- 479 **Gray JA, Shalit-Kaneh A, Chu DN, Hsu PY, Harmer SL. 2017.** The REVEILLE Clock Genes Inhibit  
480 Growth of Juvenile and Adult Plants by Control of Cell Size. *Plant Physiology* **173**: 2308–2322.
- 481 **Green RM, Tingay S, Wang Z-Y, Tobin EM. 2002.** Circadian rhythms confer a higher level of fitness  
482 to Arabidopsis plants. *Plant Physiology* **129**: 576–584.
- 483 **Harmer SL, Hogenesch JB, Straume M, Chang HS, Han B, Zhu T, Wang X, Kreps JA, Kay SA. 2000.**  
484 Orchestrated transcription of key pathways in Arabidopsis by the circadian clock. *Science (New*  
485 *York, N.Y.)* **290**: 2110–2113.
- 486 **Haydon MJ, Mielczarek O, Robertson FC, Hubbard KE, Webb AA. 2013.** Photosynthetic  
487 entrainment of the Arabidopsis thaliana circadian clock. *Nature* **502**: 689–92.
- 488 **He Y, Michaels SD, Amasino RM. 2003.** Regulation of flowering time by histone acetylation in  
489 Arabidopsis. *Science (New York, N.Y.)* **302**: 1751–1754.
- 490 **Herrero E, Kolmos E, Bujdoso N, Yuan Y, Wang M, Berns MC, Uhlworm H, Coupland G, Saini R,**  
491 **Jaskolski M, et al. 2012.** EARLY FLOWERING4 recruitment of EARLY FLOWERING3 in the nucleus  
492 sustains the Arabidopsis circadian clock. *The Plant Cell* **24**: 428–443.
- 493 **Higgins JA, Bailey PC, Laurie DA. 2010.** Comparative Genomics of Flowering Time Pathways Using  
494 Brachypodium distachyon as a Model for the Temperate Grasses. *PLOS ONE* **5**: e10065.

- 495 **Hotta CT, Nishiyama MY, Souza GM. 2013.** Circadian rhythms of sense and antisense  
496 transcription in sugarcane, a highly polyploid crop. *PLoS One* **8**: e71847.
- 497 **Huang H, Gehan MA, Huss SE, Alvarez S, Lizarraga C, Gruebbling EL, Gierer J, Naldrett MJ,**  
498 **Bindbeutel RK, Evans BS, et al. 2017.** Cross-species complementation reveals conserved functions  
499 for EARLY FLOWERING 3 between monocots and dicots. *Plant Direct* **1**: e00018.
- 500 **Huang W, Pérez-García P, Pokhilko A, Millar AJ, Antoshechkin I, Riechmann JL, Mas P. 2012.**  
501 Mapping the Core of the Arabidopsis Circadian Clock Defines the Network Structure of the  
502 Oscillator. *Science* **336**: 75–79.
- 503 **Hughes ME, Hogenesch JB, Kornacker K. 2010.** JTK\_CYCLE: an efficient nonparametric algorithm  
504 for detecting rhythmic components in genome-scale data sets. *Journal of Biological Rhythms* **25**:  
505 372–380.
- 506 **Izawa T, Mihara M, Suzuki Y, Gupta M, Itoh H, Nagano AJ, Motoyama R, Sawada Y, Yano M,**  
507 **Hirai MY, et al. 2011.** Os-GIGANTEA confers robust diurnal rhythms on the global transcriptome  
508 of rice in the field. *The Plant Cell* **23**: 1741–1755.
- 509 **Kebrom TH, McKinley BA, Mullet JE. 2020.** Shade signals alter the expression of circadian clock  
510 genes in newly-formed bioenergy sorghum internodes. *Plant Direct* **4**: e00235.
- 511 **Kim W-Y, Fujiwara S, Suh S-S, Kim J, Kim Y, Han L, David K, Putterill J, Nam HG, Somers DE. 2007.**  
512 ZEITLUPE is a circadian photoreceptor stabilized by GIGANTEA in blue light. *Nature* **449**: 356–360.
- 513 **Kölling K, Thalmann M, Müller A, Jenny C, Zeeman SC. 2015.** Carbon partitioning in Arabidopsis  
514 thaliana is a dynamic process controlled by the plants metabolic status and its circadian clock.  
515 *Plant, Cell & Environment* **38**: 1965–1979.
- 516 **Langfelder P, Horvath S. 2008.** WGCNA: an R package for weighted correlation network analysis.  
517 *BMC bioinformatics* **9**: 559.
- 518 **Lembke CG, Nishiyama MY, Sato PM, de Andrade RF, Souza GM. 2012.** Identification of sense  
519 and antisense transcripts regulated by drought in sugarcane. *Plant Molecular Biology* **79**: 461–  
520 477.
- 521 **Masclaux-Daubresse C, Valadier M-H, Carrayol E, Reisdorf-Cren M, Hirel B. 2002.** Diurnal  
522 changes in the expression of glutamate dehydrogenase and nitrate reductase are involved in the  
523 C/N balance of tobacco source leaves. *Plant, Cell & Environment* **25**: 1451–1462.
- 524 **Matsuzaki J, Kawahara Y, Izawa T. 2015.** Punctual transcriptional regulation by the rice circadian  
525 clock under fluctuating field conditions. *The Plant Cell* **27**: 633–648.
- 526 **Midmore DJ. 1980.** Effects of photoperiod on flowering and fertility of sugarcane (*Saccharum*  
527 *spp.*). *Field Crops Research* **3**: 65–81.
- 528 **Mockler TC, Michael TP, Priest HD, Shen R, Sullivan CM, Givan SA, McEntee C, Kay SA, Chory J.**  
529 **2007.** The DIURNAL project: DIURNAL and circadian expression profiling, model-based pattern  
530 matching, and promoter analysis. *Cold Spring Harbor Symposia on Quantitative Biology* **72**: 353–  
531 363.

- 532 **Moore PH, Berding N. 2013.** Flowering. In: Sugarcane: Physiology, Biochemistry, and Functional  
533 Biology. John Wiley & Sons, Ltd, 379–410.
- 534 **Nagano AJ, Kawagoe T, Sugisaka J, Honjo MN, Iwayama K, Kudoh H. 2019.** Annual transcriptome  
535 dynamics in natural environments reveals plant seasonal adaptation. *Nature Plants* **5**: 74.
- 536 **Nagano AJ, Sato Y, Mihara M, Antonio BA, Motoyama R, Itoh H, Nagamura Y, Izawa T. 2012.**  
537 Deciphering and prediction of transcriptome dynamics under fluctuating field conditions. *Cell* **151**:  
538 1358–1369.
- 539 **Nakamichi N, Kiba T, Henriques R, Mizuno T, Chua N-H, Sakakibara H. 2010.** PSEUDO-RESPONSE  
540 REGULATORS 9, 7, and 5 are transcriptional repressors in the Arabidopsis circadian clock. *The*  
541 *Plant Cell* **22**: 594–605.
- 542 **Panter PE, Muranaka T, Cuitun-Coronado D, Graham CA, Yochikawa A, Kudoh H, Dodd AN. 2019.**  
543 Circadian Regulation of the Plant Transcriptome Under Natural Conditions. *Frontiers in Genetics*  
544 **10**.
- 545 **Preston JC, Kellogg EA. 2006.** Reconstructing the Evolutionary History of Paralogous  
546 APETALA1/FRUITFULL-Like Genes in Grasses (Poaceae). *Genetics* **174**: 421–437.
- 547 **Rawat R, Takahashi N, Hsu PY, Jones MA, Schwartz J, Salemi MR, Phinney BS, Harmer SL. 2011.**  
548 REVEILLE8 and PSEUDO-RESPONSE REGULATOR5 form a negative feedback loop within the  
549 Arabidopsis circadian clock. *PLoS genetics* **7**: e1001350.
- 550 **Reshef N, Fait A, Agam N. 2019.** Grape berry position affects the diurnal dynamics of its metabolic  
551 profile. *Plant, Cell & Environment* **42**: 1897–1912.
- 552 **Roessner U, Luedemann A, Brust D, Fiehn O, Linke T, Willmitzer L, Fernie A. 2001.** Metabolic  
553 profiling allows comprehensive phenotyping of genetically or environmentally modified plant  
554 systems. *The Plant Cell* **13**: 11–29.
- 555 **Shibaya T, Hori K, Ogiso-Tanaka E, Yamanouchi U, Shu K, Kitazawa N, Shomura A, Ando T, Ebana  
556 K, Wu J, et al. 2016.** Hd18, Encoding Histone Acetylase Related to Arabidopsis FLOWERING LOCUS  
557 D, is Involved in the Control of Flowering Time in Rice. *Plant & Cell Physiology* **57**: 1828–1838.
- 558 **Song YH, Kubota A, Kwon MS, Covington MF, Lee N, Taagen ER, Laboy Cintrón D, Hwang DY,  
559 Akiyama R, Hodge SK, et al. 2018.** Molecular basis of flowering under natural long-day conditions  
560 in Arabidopsis. *Nature Plants* **4**: 824–835.
- 561 **Tanaka N, Itoh H, Sentoku N, Kojima M, Sakakibara H, Izawa T, Itoh J-I, Nagato Y. 2011.** The  
562 COP1 Ortholog PPS Regulates the Juvenile–Adult and Vegetative–Reproductive Phase Changes in  
563 Rice. *The Plant Cell* **23**: 2143–2154.
- 564 **Webb AAR, Seki M, Satake A, Caldana C. 2019.** Continuous dynamic adjustment of the plant  
565 circadian oscillator. *Nature Communications* **10**: 550.
- 566 **Weckwerth W, Wenzel K, Fiehn O. 2004.** Process for the integrated extraction, identification and  
567 quantification of metabolites, proteins and RNA to reveal their co-regulation in biochemical  
568 networks. *Proteomics* **4**: 78–83.

569 **Yazdanbakhsh N, Sulpice R, Graf A, Stitt M, Fisahn J. 2011.** Circadian control of root elongation  
570 and C partitioning in *Arabidopsis thaliana*. *Plant, Cell & Environment* **34**: 877–894.

571 **Zhao J, Huang X, Ouyang X, Chen W, Du A, Zhu L, Wang S, Deng XW, Li S. 2012.** OsELF3-1, an  
572 Ortholog of *Arabidopsis* EARLY FLOWERING 3, Regulates Rice Circadian Rhythm and Photoperiodic  
573 Flowering. *PLOS ONE* **7**: e43705.

574

575 **Supplemental Figure 1**

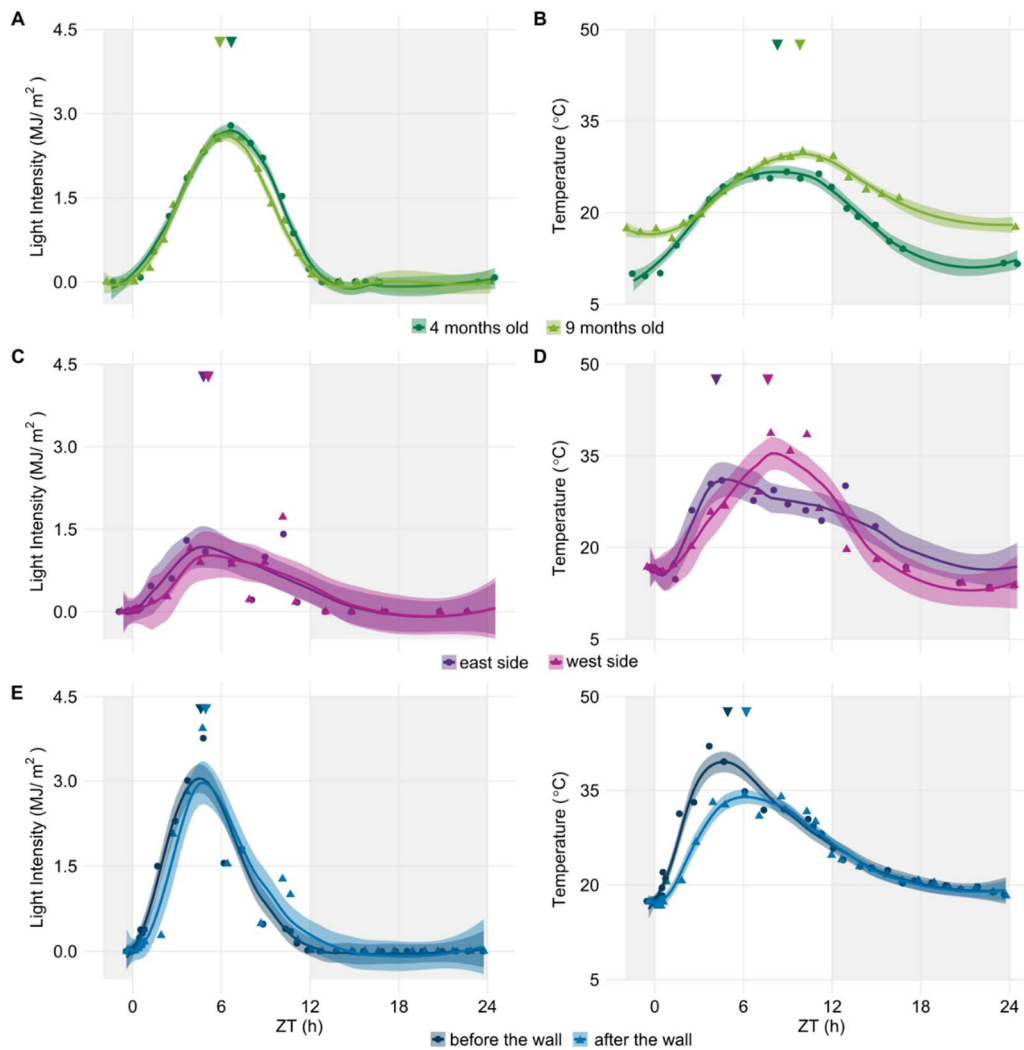

576

577 **Figure S1 – Environmental conditions in Araras (SP, Brazil. (A)** Light intensity and **(B)**  
578 temperature on the day of harvesting 4 months old (4 mo.) (green) and 9 mo. (light green)  
579 sugarcane. Data was taken from a meteorological station nearby the sugarcane field. **(C)**  
580 Light intensity and **(D)** temperature on the day of harvesting 6 mo. sugarcane in the east  
581 (purple) or the west side (pink) of the field. Data was taken from sensors installed next to  
582 the plants. **(E)** Light intensity and **(F)** temperature on the day of harvesting 5 mo.  
583 sugarcane in the east side of the field (dark blue) and sugarcane that were shaded by an  
584 artificial wall (light blue). Data was taken from sensors installed next to the plants. All data  
585 and their LOESS curve (continuous lines  $\pm$  SE) are shown. Inverted triangles show the  
586 time of the maximum value of the LOESS curve. To compare the rhythms of samples  
587 harvested in different seasons, the time of harvesting (ZT) was normalized to a  
588 photoperiod of 12 h day/ 12 h night. The light-grey boxes represent the night period.

589 **Supplemental Figure 2**

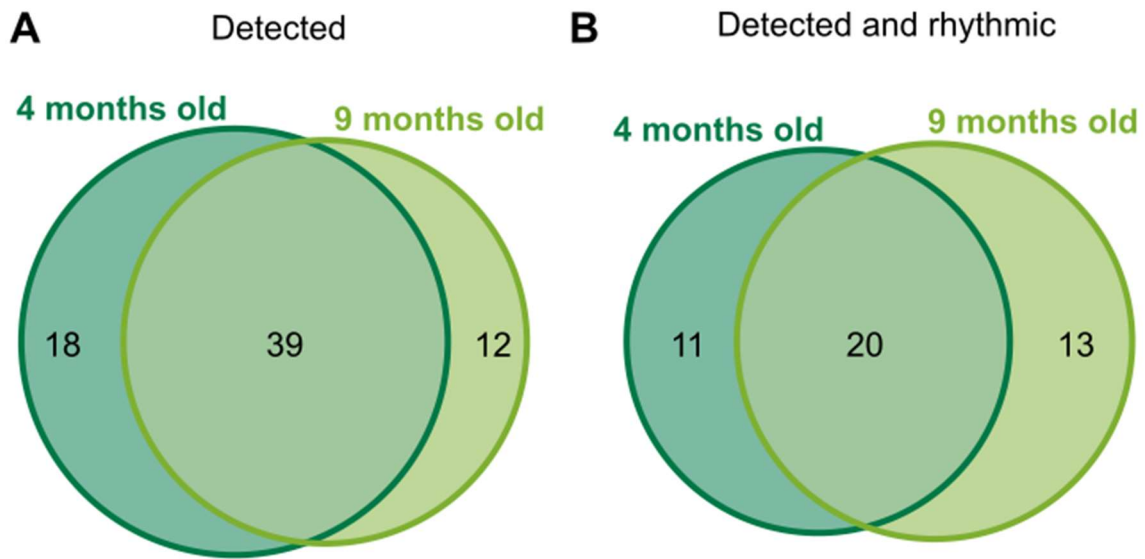

590

591 **Figure S2 – Euler diagram of detected and rhythmic metabolites.** Euler diagrams of  
592 all **(A)** detected metabolites and **(B)** rhythmic metabolites in 4 mo. (dark green) and 9 mo.  
593 (light green) sugarcane leaves in diel conditions.

594

595

596 **Supplemental Figure 3**

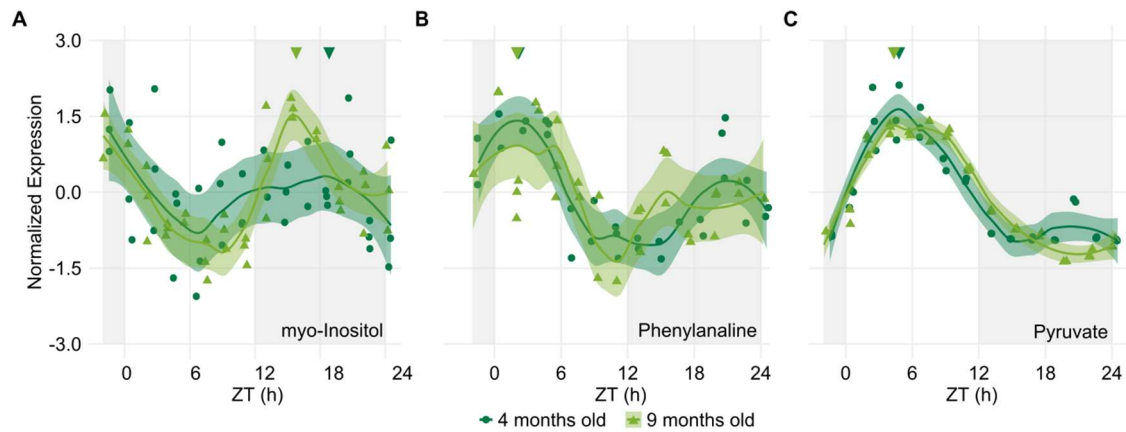

597

598 **Figure S3 – Metabolite rhythms that had an early phase or no phase change in 9**  
599 **months old sugarcane compared to 4 months old sugarcane.** Leaf +1 of sugarcane  
600 grown for 4 months old (4 mo., dark green) and 9 mo. (light green) in the field were  
601 harvested for 26 h. Rhythms of (A) myo-Inositol, (B) Phenylalanine, (C) Pyruvate and (D)  
602 Phenylalanine in 4 mo. and 9 mo. Metabolite levels were normalized with Z-score. All  
603 biological replicates (circles in 4 mo. and triangles in 9 mo.) and their LOESS curve  
604 (continuous lines  $\pm$  SE) are shown. Inverted triangles show the time of the maximum value  
605 of the LOESS curve. To compare the rhythms of samples harvested in different seasons,  
606 the time of harvesting (ZT) was normalized to a photoperiod of 12 h day/ 12 h night. The  
607 light-grey boxes represent the night period.

608

609 **Supplemental Figure 4**

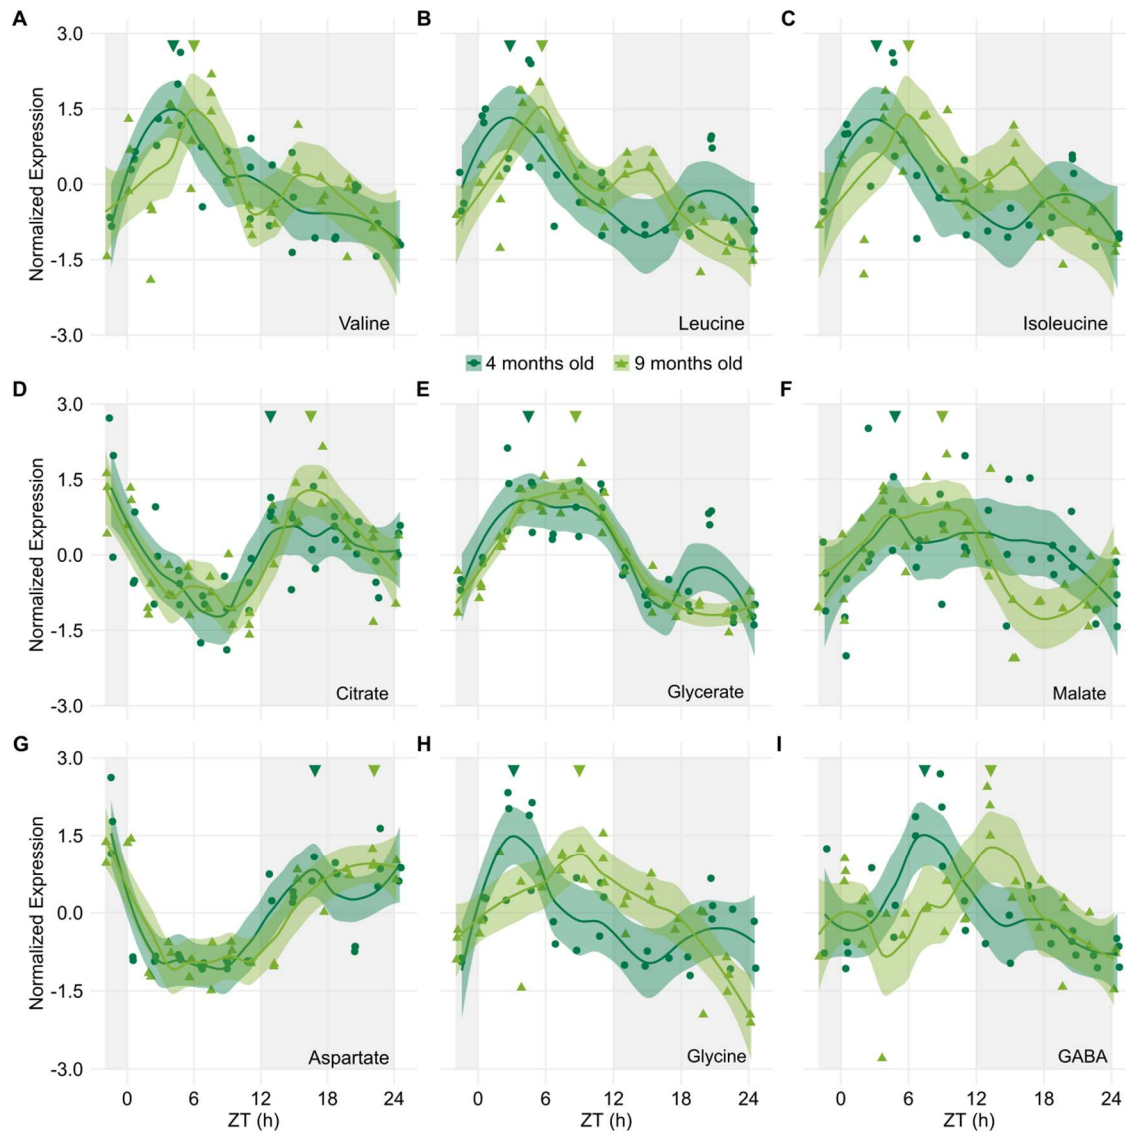

610

611 **Figure S4 – Metabolite rhythms that had a phase increase smaller or equivalent to 6**  
612 **h in 9 months old sugarcane compared to 4 months old sugarcane.** Leaf +1 of  
613 sugarcane grown for 4 months old (4 mo., dark green) and 9 mo. (light green) in the field  
614 were harvested for 26 h. Rhythms of (A) Valine, (B) Leucine, (C) Isoleucine, (D) Citrate,  
615 (E) Glycerate, (F) Malate, (G) Aspartate, (H) Glycine, and (I) GABA in 4 mo. and 9 mo.  
616 sugarcane leaves. Metabolite levels were normalized with Z-score. All biological replicates  
617 (circles in 4 mo. and triangles in 9 mo.) and their LOESS curve (continuous lines  $\pm$  SE)  
618 are shown. Inverted triangles show the time of the maximum value of the LOESS curve.  
619 To compare the rhythms of samples harvested in different seasons, the time of harvesting  
620 (ZT) was normalized to a photoperiod of 12 h day/ 12 h night. The light-grey boxes  
621 represent the night period.



622 **Supplemental Figure 5**

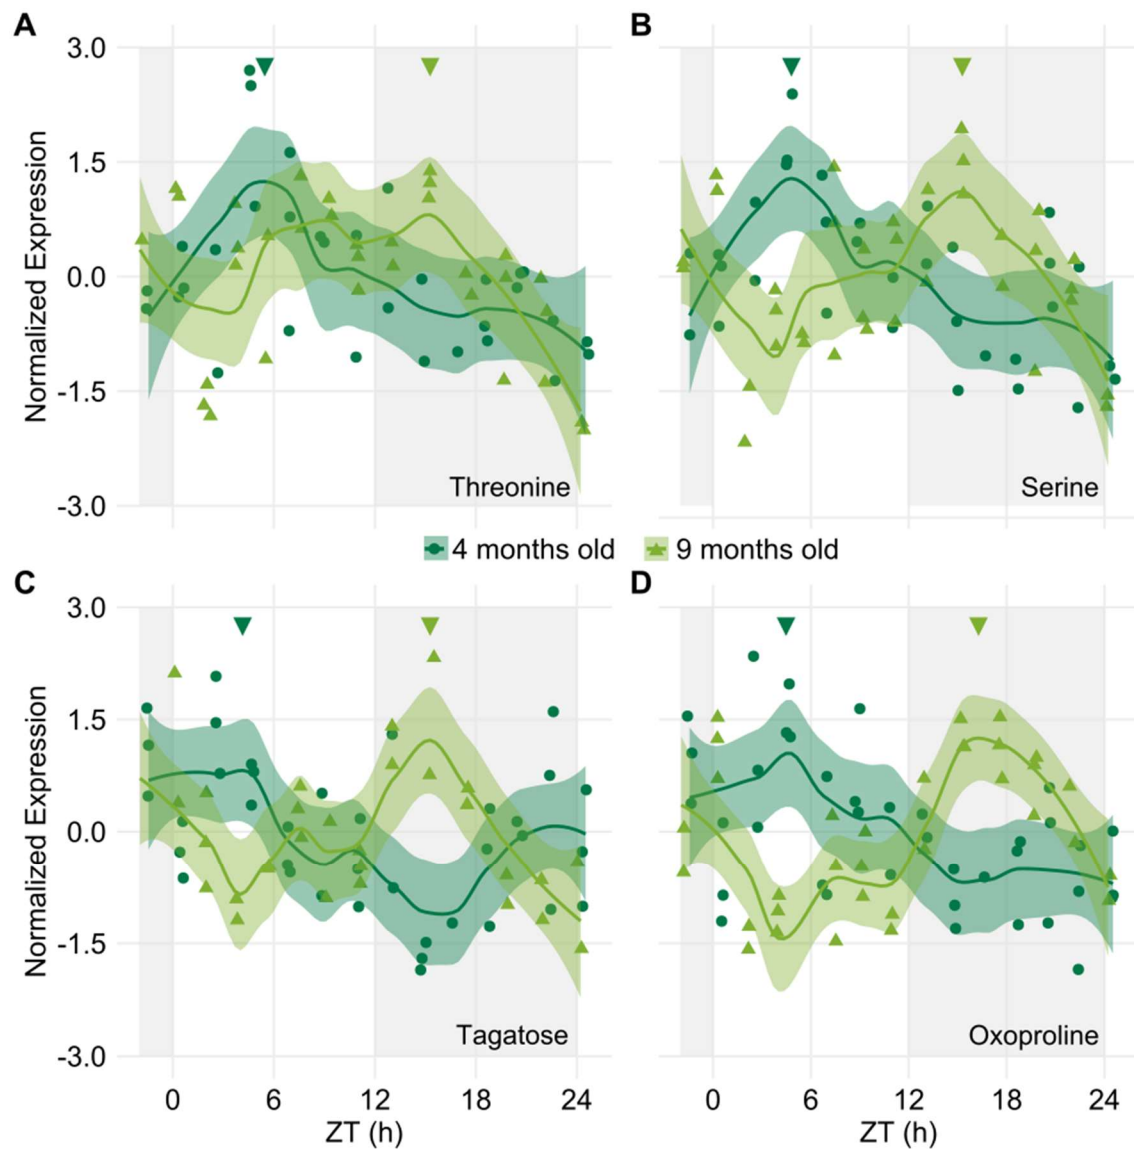

623

624 **Figure S5 – Metabolite rhythms that had a phase increase larger than 6 h in 9**  
625 **months old sugarcane compared to 4 months old sugarcane.** Leaf +1 of sugarcane  
626 grown for 4 months old (4 mo., dark green) and 9 mo. (light green) in the field were  
627 harvested for 26 h. Rhythms of (A) Threonine, (B) Serine, (C) Tagatose and (D)  
628 Oxoproline in 4 mo. and 9 mo. Metabolite levels were normalized with Z-score. All  
629 biological replicates (circles in 4 mo. and triangles in 9 mo.) and their LOESS curve  
630 (continuous lines  $\pm$  SE) are shown. Inverted triangles show the time of the maximum value  
631 of the LOESS curve. To compare the rhythms of samples harvested in different seasons,  
632 the time of harvesting (ZT) was normalized to a photoperiod of 12 h day/ 12 h night. The  
633 light-grey boxes represent the night period.

634 **Supplemental Figure 6**

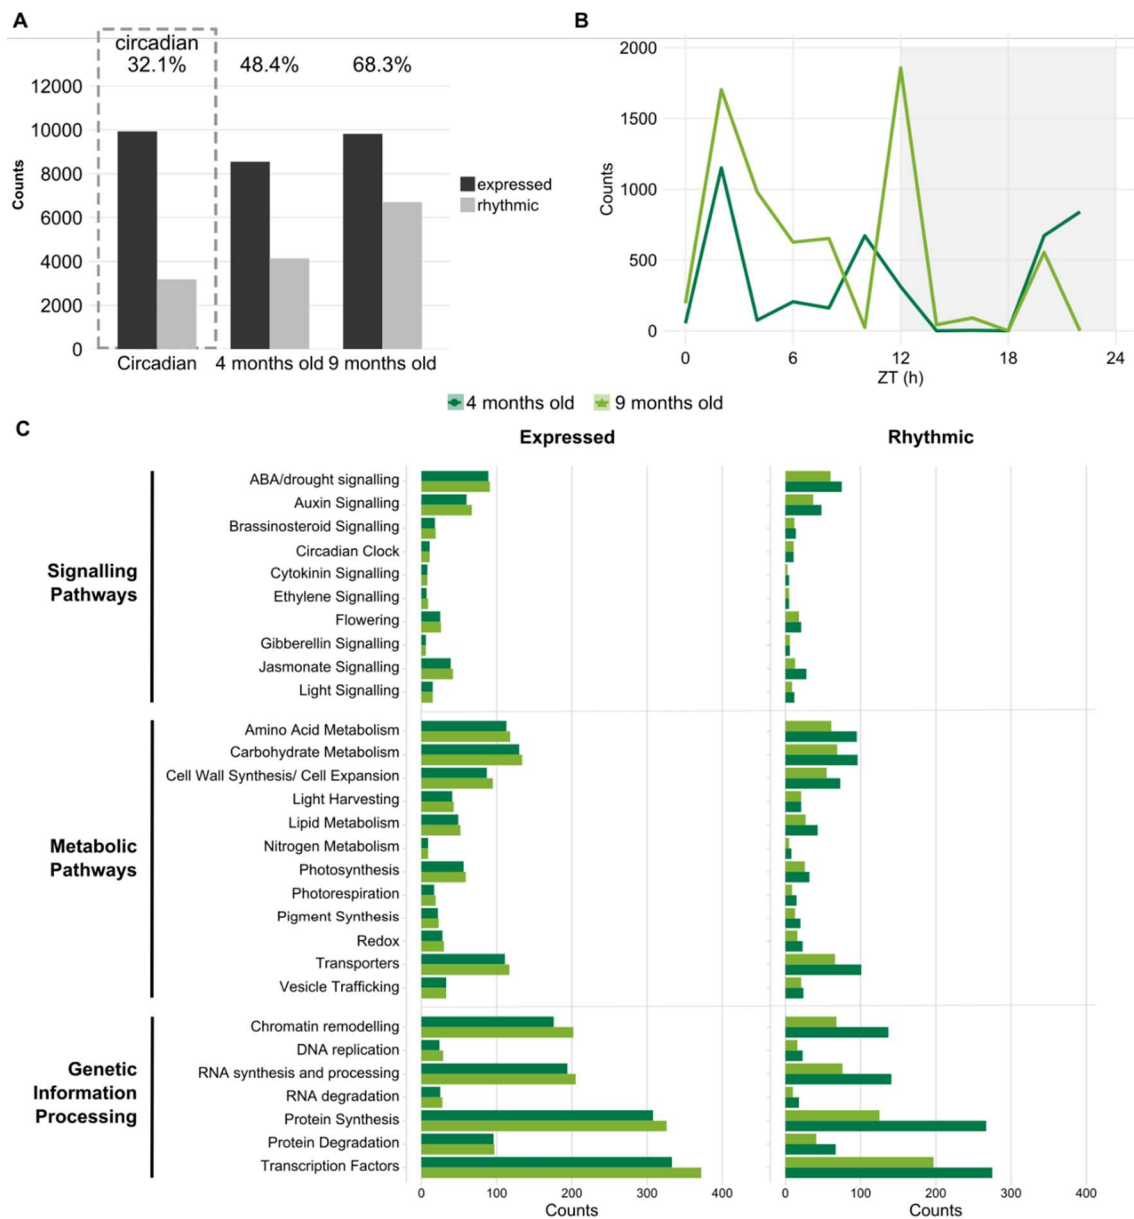

635

636 **Figure S6 – 9 months old sugarcane has more rhythmic transcripts than 4 months**  
 637 **old sugarcane. (A)** The number of expressed and rhythmic transcripts detected in the  
 638 leaves of 4 months old (4 mo.) and 9 mo. sugarcane in field-grown (diel) conditions, and in  
 639 3 mo. leaves in circadian conditions published in Hotta et al. (2013)(Hotta *et al.*, 2013). **(B)**  
 640 Distribution of the peak time of rhythmic transcripts in 4 mo. and 9 mo. sugarcane. **(C)**  
 641 Distribution of the functional categories of expressed and rhythmic transcripts in 4 mo.  
 642 (dark green) and 9 mo. (light green) sugarcane.

643

644 **Supplemental Figure 7**

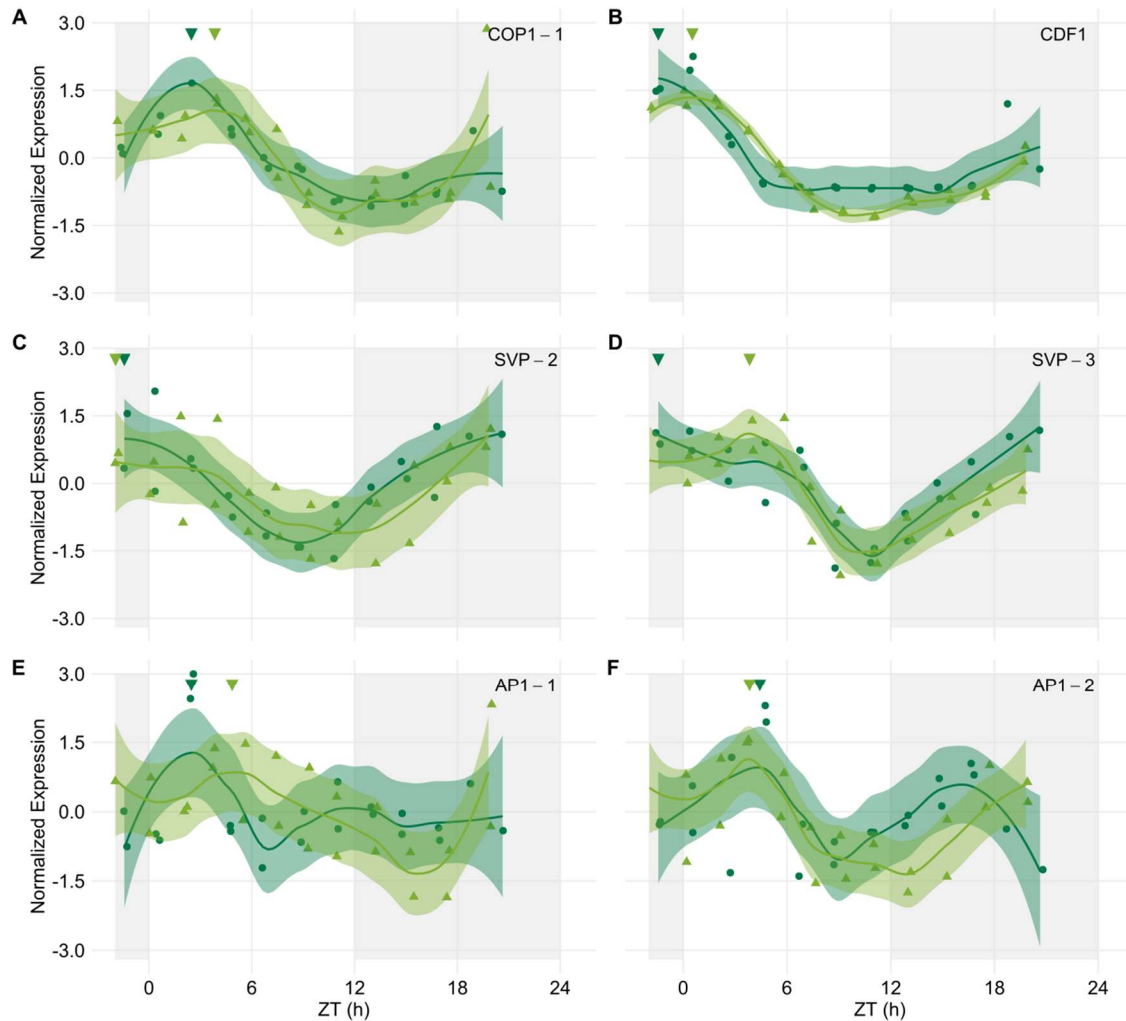

645

646 **Figure S7 – Rhythms of genes associated with flowering in the leaves of 4 months**  
647 **old and 9 months old sugarcane.** Rhythms of **(A) CONSTITUTIVE**  
648 **PHOTOMORPHOGENIC 1 (*ScCOP1*), (B) CYCLING DOF FACTOR1 (*ScCDF1*), (C)**  
649 **SHORT VEGETATIVE-1 (*ScSVP-2*), (D) *ScSVP-3*, (E) APETALA1-1 (*ScAP1-1*), and (F)**  
650 ***ScAP1-2* were measured using custom Agilent oligo arrays in the leaves of 4 mo. and**  
651 **9 mo. sugarcane grown in the field. All biological replicates and their LOESS curve**  
652 **(continuous lines  $\pm$  SE) are shown. Inverted triangles show the time of the maximum value**  
653 **of the LOESS curve. Time series were normalized using Z-score. To compare the rhythms**  
654 **of samples harvested in different seasons, the time of harvesting (ZT) was normalized to a**  
655 **photoperiod of 12 h day/ 12 h night. The light-grey boxes represent the night periods.**

656

657 **Supplemental Figure 8**

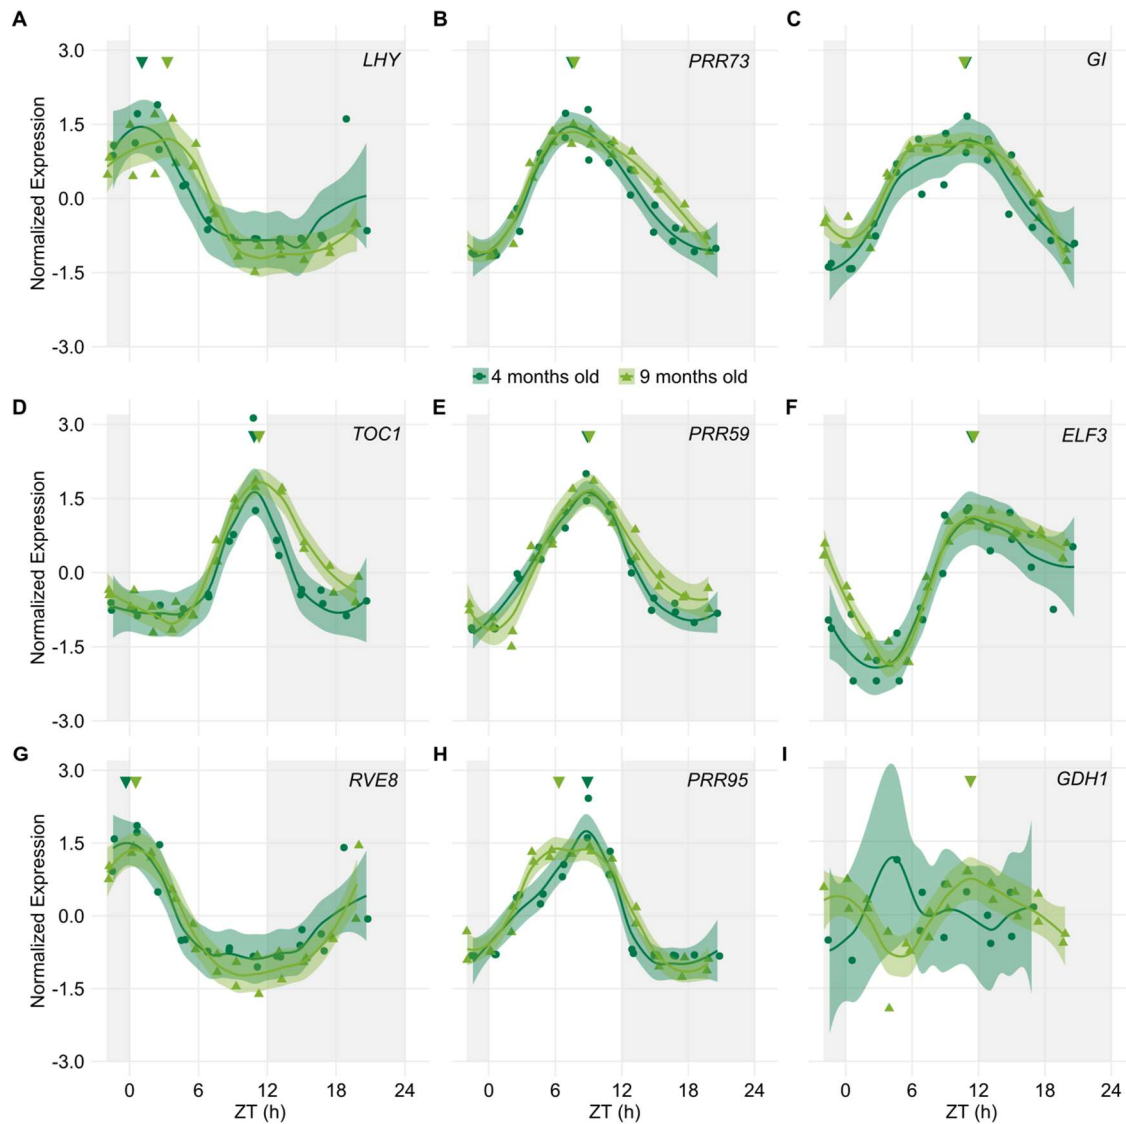

658

659 **Figure S8 – Rhythms of circadian clock genes and N metabolism genes in the**  
660 **leaves of 4 months old and 9 months old sugarcane.** Rhythms were measured using  
661 custom Agilent oligo arrays in the leaves of 4 mo. and 9 mo. sugarcane grown in the field.  
662 All biological replicates and their LOESS curve (continuous lines  $\pm$  SE) are shown.  
663 Inverted triangles show the time of the maximum value of the LOESS curve. Time series  
664 were normalized using Z-score. To compare the rhythms of samples harvested in different  
665 seasons, the time of harvesting (ZT) was normalized to a photoperiod of 12 h day/ 12 h  
666 night. The light-grey boxes represent the night periods.

667 **Supplemental Figure 9**

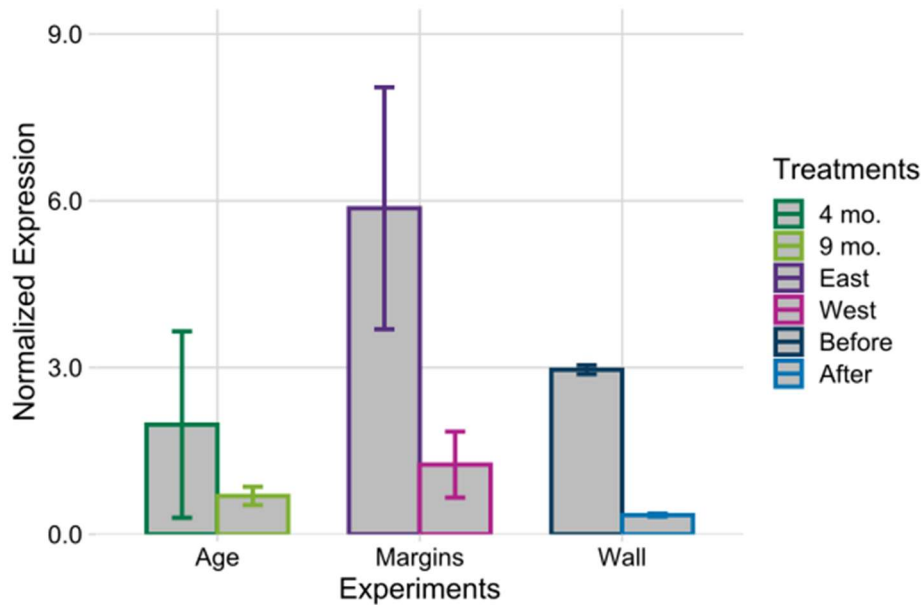

668

669 **Figure S9 – Transcript levels of *ScLHY* in the first hours of the morning.** In the Age  
670 experiment, 4 months old (dark green) and 9 months old (light leaves) sugarcane leaves  
671 were used. In the Margins experiment, sugarcane leaves from the East side (purple) or  
672 the West side (pink) of the sugarcane field were taken. In the Wall experiment, sugarcane  
673 leaves were taken from plants Before (dark blue) and After (light blue) a wooden wall on  
674 the east side of the field. Sugarcane leaves were harvested between ZT0 and ZT2 (n=3).  
675 Transcript levels were measured using RT-qPCR. Relative expression was determined  
676 using *GLYCERALDEHYDE-3-PHOSPHATE DEHYDROGENASE (ScGAPDH)*.

677

678 **Table S1 – Sugarcane genes and GenBank IDs**

| <b>Gene<br/>Symbol</b> | <b>Gene Name</b>                             | <b>SAS*</b>     | <b>GenBank ID</b> |
|------------------------|----------------------------------------------|-----------------|-------------------|
| <i>AP1</i>             | <i>APETALA1</i>                              | SCQGLR1085G10.g | CA124279.1        |
| <i>CDF1</i>            | <i>CYCLING DOF FACTOR1</i>                   | SCMCCL6053D03.g | CA098046.1        |
| <i>COP1</i>            | <i>CONSTITUTIVE PHOTOMORPHOGENIC 1</i>       | SCCCCL6003C08.g | CA096699.1        |
| <i>ELF3</i>            | <i>EARLY-FLOWERING 3</i>                     | SCEZLB1009F09.g | CA113166.1        |
| <i>FLD</i>             | <i>FLOWERING LOCUS D</i>                     | SCEQRT2090F09.g | CA138853.1        |
| <i>FT</i>              | <i>FLOWERING LOCUS T</i>                     | SCBFSD2035E11.g | CA278114.1        |
| <i>GAPDH</i>           | <i>GLYCERALDEHYDE-3-PHOSPHATE</i>            | SCQGAM2027G09.g | CA086777.1        |
| <i>GI</i>              | <i>GIGANTEA</i>                              | SCJFAD1014B07.b | CA067312.1        |
| <i>LHY</i>             | <i>LATE ELONGATED HYPOCOTYL</i>              | SCCCLR1048E10.g | CA167119.1        |
| <i>PRR59</i>           | <i>PSEUDO-RESPONSE REGULATOR 59</i>          | SCACLR1057G02.g | CA116370.1        |
| <i>PRR73</i>           | <i>PSEUDO-RESPONSE REGULATOR 73</i>          | SCACLR1057C07.g | CA116387.1        |
| <i>PRR95</i>           | <i>PSEUDO-RESPONSE REGULATOR 95</i>          | SCCCLR1077F09.g | CA120437.1        |
| <i>RVE8</i>            | <i>REVEILLE 8</i>                            | SCSGST1070F10.g | CA179134.1        |
| <i>SVP-1</i>           | <i>SHORT VEGETATIVE-1</i>                    | SCCCLR1C05A05.g | CA189804.1        |
| <i>SVP-2</i>           | <i>SHORT VEGETATIVE-2</i>                    | SCCCLR1072F01.g | CA119595.1        |
| <i>SVP-3</i>           | <i>SHORT VEGETATIVE-3</i>                    | SCCCLR2001F11.g | CA127026.1        |
| <i>SOC1</i>            | <i>SUPPRESSOR OF CONSTANS OVEREXPRESSION</i> | SCCCLR2C03H07.g | CA127525.1        |
| <i>TOC1</i>            | <i>TIME OF CAB EXPRESSION 1</i>              | SCCCSB1002H04.g | CA167119.1        |

679 \* Sugarcane Assembled Sequence.

680

681 **Table S2 – Sugarcane primers pairs used to validate oligo arrays expression levels**  
682 **using RT-qPCR**

| Gene Symbol  | SAS             | Oligonucleotide sequence (5' -> 3')                      | Reference                               |
|--------------|-----------------|----------------------------------------------------------|-----------------------------------------|
| <i>GAPDH</i> | SCQGAM2027G09.g | FWD CACGGCCACTGGAAGCA<br>RVS TCCTCAGGGTTCCTGATGCC        | Papini-Terzi et al. (2005) <sup>a</sup> |
| <i>LHY</i>   | SCCCLR1048E10.g | FWD CCACCACGGCCTAAAAGAAA<br>RVS TGGTTTTGTTGACTTGTCATTTGG | Hotta et al. (2011) <sup>b</sup>        |
| <i>TOC1</i>  | SCCCSB1002H04.g | FWD TTCTGCCTGAATTTGGCAAGTG<br>RVS GGCATCGAGCACACCAATGC   | Hotta et al. (2011) <sup>b</sup>        |

<sup>a</sup> Papini-Terzi et al. (2005) *DNA Research* 12:27, <https://doi.org/10.1093/dnares/12.1.27>

<sup>b</sup> Hotta et al. (2013) *PloS one* 8:e71847, <https://doi.org/10.1371/journal.pone.0071847>

685

686

687
